# Supplementary material for: Association of Clinicopathological Features with IgA Nephropathy: A&nbsp;Principal Component Analysis
Source: Research Square preprint supplement (doi:10.21203/rs.3.rs-103691/v1), 2020-11-10
Supplement: Supplementary file 1 [file 0e64de9375f0211ee4a82dc1.xlsx]

## Sheet: modeldata1
	IgAN	Serum IgA （g/L）	Serum C3 （g/L）	Urinary protein quantification （g/24h）	Number of glomeruli under light microscope	Spherical hardening number	Spheroid hardening rate（%）	Segment hardening number	Total crescent formation	Cell crescent	Cell fiber crescent	Fiber crescent	Glomerular adhesion	Mesangial cells and mesangial matrix hyperplasia	Basement membrane condition	Capillary cavity opening（1,2,3）	Tubule atrophy（0，1，2,3）	Interstitial fibrosis（0，1，2，3）	Whether there is inflammatory cell infiltration in renal interstitial	Serum creatinine（umol/L）	Tonsil abnormalities	Gross hematuria	Systolic pressure （mmHg）	age（years old）	Renal insufficiency	eGFR	Blood urea nitrogen （mmol/L）	Blood uric acid （umol/L）
1	1	4.49	0.92	0.05	19	2	10.5	0	0	0	0	0	0	3	0	1	1	1	1	56.1	1	0	125	37	0	88.3	7.86	183.1
2	1	1.71	0.89	0.427	3	0	0	0	0	0	0	0	0	4	0	1	1	1	1	64.2	0	0	134	30	0	143.31	5.31	220.8
3	1	2.4	1.42	0.224	12	0	0	0	0	0	0	0	0	3	0	1	0	0	0	57.5	0	0	109	52	0	108.8	6.68	148.9
4	1	2.97	1.01	0.578	9	0	0	2	2	0	2	0	0	3	6	1	0	0	0	92.1	1	1	114	25	0	75.72	8.15	304
5	0	2.54	1.41	0.132	9	4	44.4	2	0	0	0	0	0	2	0	1	1	1	1	56.1	0	0	87	47	0	103.99	5.66	306.4
6	0	5.9	1.6	0.121	9	0	0	1	1	0	0	1	0	3	6	1	1	1	1	71.4	0	0	130	29	0	97.52	3.64	341.7
7	0	4	1.19	0.107	11	0	0	0	0	0	0	0	0	2	0	1	1	1	1	47.4	0	0	132	48	0	129.87	2.82	180.8
8	0	1.91	0.84	0.138	11	0	0	1	0	0	0	0	0	2	0	1	0	0	0	64.3	0	0	107	15	0	124.34	5.6	294.3
9	1	3.38	0.87	0.476	7	0	0	2	0	0	0	0	2	3	0	1	1	1	1	90.9	0	0	128	25	0	93.37	5.4	454.8
10	0	1.14	0.83	0.131	15	0	0	1	0	0	0	0	0	2	0	1	0	0	0	50	0	0	105	21	0	107	3.57	266.2
11	1	2.35	1.15	0.7	13	1	7.7	3	0	0	0	0	0	4	6	3	1	1	1	64.7	2	1	107	17	0	95.4	6.09	348.3
12	1	6.42	1.04	0	7	0	0	1	0	0	0	0	0	2	0	1	1	1	1	53.6	0	1	122	25	0	98.7	4.14	235.8
13	0	5.02	0.86	1.052	21	6	28.6	3	0	0	0	0	0	2	0	1	1	1	1	69.1	0	0	110	25	0	100.92	4.76	463.5
14	1	2.65	0.96	0.37	27	0	0	0	1	0	1	0	0	3	0	2	0	0	0	50.5	0	0	110	22	0	141.69	3.98	344
15	1	4.31	1.09	0.365	15	0	0	2	1	0	1	0	0	3	0	1	1	1	1	55.6	2	1	124	26	0	107.18	3.82	271.5
16	0	2.37	0.89	0.203	13	0	0	0	0	0	0	0	0	2	0	1	1	1	1	60.4	0	0	110	33	0	135.1	5.28	325.4
17	0	2.69	0.93	2.138	13	3	16.7	1	0	0	0	0	1	3	0	1	1	1	1	68.2	0	0	134	58	0	77.94	4.59	301.7
18	1	1.68	1.26	0.148	16	1	6.3	1	0	0	0	0	0	2	0	1	1	1	1	69.1	2	0	148	44	0	81.34	4.81	196.9
19	0	2.29	0.78	0.077	17	0	0	0	0	0	0	0	0	3	0	2	0	0	0	61.4	0	0	105	33	0	103.85	4.3	216.9
21	0	3.99	1.18	3.772	12	5	41.7	4	0	0	0	0	0	3	6	3	2	2	1	140.4	0	0	115	32	0	49.06	4.1	404.5
22	0	1.31	1.01	0.233	13	0	0	3	2	0	2	0	0	3	0	3	1	1	1	64.3	0	0	127	21	0	96.75	4.92	240.3
23	1	2.69	0.95	0.716	15	2	13.3	1	0	0	0	0	0	2	0	1	1	1	1	49.4	0	0	131	25	0	126.56	3.45	213.8
24	1	3.43	0.99	0.267	14	0	0	1	0	0	0	0	0	2	0	1	1	1	1	87.3	0	0	128	26	0	118.78	2.8	242.9
25	0	2.11	1.15	0.965	7	0	0	1	0	0	0	0	0	2	0	1	2	2	1	96.1	0	0	120	24	0	100.96	4.81	367.8
26	1	4.54	0.98	0.102	14	0	0	0	0	0	0	0	0	2	0	1	0	0	0	68.1	1	0	121	23	0	112	4.38	469.8
27	0	3.58	0.88	0.169	33	8	24.2	0	0	0	0	0	0	2	0	1	2	2	1	98.5	0	0	94	27	0	56.37	4.6	258.8
28	1	2.9	0.99	0.168	10	0	0	0	0	0	0	0	0	3	0	1	0	0	1	65.4	0	0	132	24	0	128.72	4.16	409.8
29	1	0.125	0.88	0.997	20	1	5	4	3	1	2	0	0	3	6	3	0	0	0	82.3	0	0	117	22	0	82.89	4.58	217.3
30	1	3.97	0.97	0.278	20	3	15	5	1	0	1	0	0	3	6	3	1	1	1	92.5	0	0	111	41	0	59.31	2.7	191.9
31	1	2.55	1.02	0.031	15	0	0	0	0	0	0	0	0	2	0	1	0	0	0	43.2	0	0	113	13	0	159.1	5.64	487.1
32	1	1.47	1.03	0.887	13	3	23.1	1	0	0	0	0	0	3	0	1	1	1	1	81.7	1	0	99	34	0	71.89	2.8	315.6
33	0	2.12	1.23	0.109	9	1	11.1	0	0	0	0	0	1	2	0	1	1	1	1	49	0	0	84	47	0	91.28	5.08	328.7
34	0	2.61	0.94	0.632	3	0	0	0	0	0	0	0	0	2	0	1	0	0	0	70	1	0	110	35	0	73.71	4.09	248.6
35	0	2.8	1.16	0.35	20	1	5	1	0	0	0	0	0	3	0	1	1	1	1	99	0	0	130	37	0	85.74	5.1	187.3
36	0	1.31	0.88	0.148	17	1	5.9	0	0	0	0	0	0	2	6	1	1	1	1	95.7	0	0	105	35	0	71.12	4.3	367.4
37	1	2.65	0.88	0.221	6	0	0	0	0	0	0	0	0	2	0	1	1	1	1	88.4	0	0	114	36	0	62.73	5.2	276.4
39	1	2.79	1.19	0.199	23	5	21.7	3	0	0	0	0	0	3	0	1	1	1	1	105.2	0	0	115	53	0	38.04	4.6	255.8
40	1	2.95	1.12	0.174	15	0	0	0	0	0	0	0	0	2	0	1	1	1	1	57.8	0	0	116	34	0	97.79	7.12	366.8
41	0	1.7	1.29	0.201	28	2	7.2	0	0	0	0	0	0	2	0	1	1	1	1	41.7	0	0	121	23	0	187.74	3.21	228.8
42	1	2.63	0.94	0.368	14	0	0	2	0	0	0	0	0	3	0	1	1	1	1	48.5	1	0	118	20	0	129.34	3.56	212
43	1	5.8	1.29	0.643	20	2	10	3	0	0	0	0	0	3	0	1	1	1	1	107.2	0	0	122	32	0	97.9	6.36	426.6
44	1	2.53	1.31	0.956	17	4	23.5	1	0	0	0	0	0	3	0	1	2	2	1	69.3	0	0	120	43	0	95.12	5.53	332.4
46	1	3.28	0.75	0.797	11	2	18.2	2	0	0	0	0	0	2	0	1	1	1	1	110.3	0	0	129	30	0	69.92	6.17	424.7
47	1	3.34	1.19	0.44	12	0	0	1	0	0	0	0	0	3	0	1	1	1	1	109.1	2	1	117	18	0	111.41	4.6	285.2
48	1	2.65	1.08	0.372	14	0	0	0	0	0	0	0	0	2	5	1	0	0	0	66.3	2	0	124	17	0	141.48	3.94	391.3
49	1	1.96	0.83	0.052	21	2	9.5	0	0	0	0	0	0	3	0	1	1	1	1	54.9	1	1	118	30	0	107.88	4.43	210
51	0	1.77	1.04	0	15	0	0	0	0	0	0	0	0	3	0	1	1	1	1	52.6	0	1	98	28	0	92.39	3.39	258.6
53	1	2.99	0.87	0.24	16	4	25	4	0	0	0	0	0	3	6	3	1	1	1	66.2	0	0	127	44	0	84.9	3.48	388.6
54	0	2.91	1.07	0.127	6	0	0	0	0	0	0	0	0	2	0	1	1	1	1	56.2	0	0	108	39	0	116.49	5.15	437.7
56	1	3.03	0.74	0.303	11	0	0	0	0	0	0	0	0	3	0	1	0	0	0	60.8	0	0	119	23	0	96.57	3.03	225.3
57	1	2.55	0.69	0.105	7	0	0	0	0	0	0	0	0	3	0	1	0	0	0	65.7	1	0	152	25	0	115.18	4.94	375.7
58	1	1.37	0.87	0.866	13	7	53.8	3	0	0	0	0	0	3	0	1	1	1	1	74.1	0	0	100	33	0	76.99	4.67	296.1
59	1	3.16	0.69	0	23	4	17.4	2	1	1	0	0	0	3	0	1	1	1	1	95.2	0	0	138	44	0	63.26	6.73	364.7
61	0	1.87	0.79	0	22	0	0	0	0	0	0	0	0	3	0	1	0	0	0	51.9	0	0	112	36	0	115.23	3.64	217
62	0	1.85	0.7	0.091	9	0	0	0	0	0	0	0	0	2	0	1	0	0	0	72.2	0	0	100	30	0	74.86	5.42	267
63	0	1.81	0.78	0.065	17	2	11.8	0	0	0	0	0	0	3	0	1	1	1	1	52.9	0	0	97	45	0	97.63	4.25	208.1
64	1	2.91	0.95	0.336	16	1	6.3	2	0	0	0	0	0	3	0	1	1	1	1	69.9	1	0	113	38	0	93.83	4.71	282.4
65	1	0.95	0.86	0.037	24	0	0	0	0	0	0	0	0	2	0	1	0	0	0	55.6	0	1	100	70	0	65.81	5.64	409.1
66	1	1.71	0.68	0.086	22	0	0	2	0	0	0	0	2	3	0	1	1	1	1	63	1	0	120	23	0	81.55	4.35	269.1
67	0	2.01	0.75	0.081	20	2	10	1	0	0	0	0	0	2	0	1	1	1	1	66.7	0	0	132	36	0	84.77	5.72	237.8
68	1	3.41	0.86	0	21	0	0	1	0	0	0	0	1	2	0	1	1	1	1	59	0	1	110	21	0	92.78	2.73	419.9
69	0	1.2	0.98	0.048	7	0	0	0	0	0	0	0	0	2	0	1	0	0	0	51.5	1	1	113	30	0	109.42	5.25	320.7
70	1	2.61	1.15	1.655	6	2	16.7	1	1	0	0	1	0	2	6	3	1	1	1	83	1	1	116	30	0	70.67	6.89	363
72	0	1.44	0.99	0.025	8	0	0	0	0	0	0	0	0	2	0	1	0	0	0	41.4	0	0	110	15	0	157.84	5.17	258.3
73	1	2.97	1.13	0.335	20	0	0	2	0	0	0	0	0	2	6	3	1	1	1	55	4	1	124	20	0	102.65	2.29	227.4
75	1	2.32	0.98	0	11	4	36.4	0	0	0	0	0	0	2	0	1	1	1	1	43.2	0	1	137	63	0	76.4	5.87	202.8
78	1	1.31	0.84	1.584	23	14	60.9	5	0	0	0	0	0	2	0	2	3	3	1	121.3	0	0	134	20	0	76.66	8.38	367.2
79	1	1.9	1.33	0.27	14	0	0	0	0	0	0	0	0	2	0	1	1	1	1	55	0	1	130	45	0	107.45	5.25	261.4
80	1	1.64	0.8	0.19	14	0	0	0	0	0	0	0	0	3	0	1	0	0	0	42.4	2	0	115	14	0	160.83	2.65	40.1
81	1	4.04	0.88	0.122	10	0	0	1	0	0	0	0	0	2	0	1	1	1	1	57.5	1	0	112	30	0	100	4.82	249.3
82	0	3.1	1.04	0.137	11	0	0	1	0	0	0	0	0	2	0	1	1	1	1	45.3	0	0	106	32	0	137.09	5.23	192.3
83	0	6.1	0.82	0.065	10	2	20	2	0	0	0	0	0	2	0	1	1	1	1	65.6	0	0	121	20	0	101.36	4.64	467.3
84	1	2.21	0.22	0	25	3	12	0	4	4	0	0	1	3	0	1	1	1	1	75	1	0	104	16	0	99.65	6.91	524.1
85	0	1.97	0.76	0.18	17	0	0	0	0	0	0	0	0	2	2	0	0	0	0	68.4	0	0	112	19	0	147.96	6.05	541.4
86	1	2.23	0.89	0.404	10	1	10	2	0	0	0	0	0	2	0	1	1	1	1	68.1	1	0	116	33	0	65.71	4.75	264.9
87	0	2.89	1.3	0.189	12	1	0	2	0	0	0	0	0	2	0	2	1	1	1	54.8	0	0	120	40	0	87.76	4.14	357
88	1	1.62	1.16	0.049	14	0	0	0	0	0	0	0	0	3	0	2	0	0	0	56	1	0	111	18	0	129.83	3.46	296.4
89	0	1.19	1.3	0.106	10	0	0	0	0	0	0	0	0	2	0	2	1	1	0	46.2	1	0	118	34	0	141.53	3.93	226.4
90	0	2.79	1.33	0.433	12	1	0	1	0	0	0	0	0	2	0	2	1	1	1	135.7	0	0	139	47	0	59.01	11.43	669.7
91	1	2.11	1.08	1.5	16	3	0	2	0	0	0	0	0	2	0	2	2	2	1	99.8	0	0	123	32	0	95.84	6.46	592.5
92	0	1.21	1.02	0.097	12	0	0	0	0	0	0	0	0	2	0	1	1	1	0	83	0	0	138	18	0	119.32	4.96	346.3
94	1	1.76	0.82	0.814	6	0	0	0	0	0	0	0	0	3	0	1	0	0	0	58	1	0	110	24	0	117.1	6.28	280.5
95	0	2.39	1.16	0	14	0	0	1	0	0	0	0	0	3	0	1	1	1	0	56.5	2	1	106	37	0	101.02	2.41	348
96	0	1.88	0.78	0	10	2	20	3	0	0	0	0	1	3	0	1	1	1	1	60.2	2	1	125	27	0	104.01	5.73	340.6
99	1	1.79	1.42	0.049	20	1	5	0	0	0	0	0	0	2	0	1	1	1	1	52.8	0	0	130	22	0	140.19	4.19	241.9
100	0	2.3	0.92	0.177	5	0	0	0	0	0	0	0	0	2	0	1	0	0	0	82.1	0	0	115	22	0	72.13	4.4	280.9
101	1	3.16	0.99	0.376	23	0	0	2	0	0	0	0	0	4	0	1	1	1	1	65.9	2	0	122	22	0	114.53	4.97	300.5
102	1	4.48	0.76	1.85	15	2	13.3	4	0	0	0	0	0	3	0	1	1	1	1	119.6	1	0	125	26	0	72.69	4.1	406.7
103	0	2.8	0.82	0.44	16	0	0	0	0	0	0	0	0	2	6	1	1	1	1	90.4	1	1	114	45	0	53.84	5.2	346.1
104	1	5.19	0.26	0.95	10	0	0	1	0	0	0	0	0	2	0	1	0	0	1	92.2	1	0	125	24	0	86.66	5.66	400.2
105	0	3.17	1.33	0.308	13	1	0	1	0	0	0	0	0	2	0	1	0	0	1	69.1	3	1	124	15	0	85.11	3.7	241.9
106	1	3.32	1.02	0.212	24	0	0	1	0	0	0	0	0	2	0	1	1	1	1	49.1	1	0	135	24	0	135.85	3.3	178.9
107	0	1.93	1.31	0.254	15	1	6.7	0	0	0	0	0	0	2	0	1	1	1	1	53.5	0	0	106	36	0	95.52	3.42	402.9
108	1	2.04	1.31	0.34	14	0	0	0	0	0	0	0	0	2	0	1	0	0	0	57.2	0	0	115	64	0	88.9	4.68	331.6
109	1	1.4	1.14	1.206	15	0	0	5	0	0	0	0	0	3	0	3	1	1	1	80.2	1	0	117	15	0	109.18	3.4	268.8
110	1	1.85	1.09	0.288	13	1	7.7	3	0	0	0	0	0	3	0	1	1	1	1	70.2	0	0	112	39	0	99.28	4.24	284.1
111	1	2.88	1.21	0.192	25	5	0	2	0	0	0	0	0	3	0	3	1	1	1	47.7	1	1	125	32	0	129.01	4.46	373.4
112	1	2.57	1.13	3.279	3	2	66.7	1	0	0	0	0	0	2	0	3	1	1	1	93.3	2	0	127	30	0	83.82	5.6	297.3
113	1	2	0.197	0.22	13	1	7.7	2	0	0	0	0	0	2	0	1	1	1	1	77.5	1	0	115	22	0	103	6.08	359.6
114	1	2.66	0.96	1.692	14	1	7.1	2	0	0	0	0	0	3	0	1	1	1	1	37.9	0	0	111	24	0	172.8	5.12	244
115	1	2.12	0.96	0.1	7	0	0	1	0	0	0	0	1	3	0	1	1	1	1	17.7	1	0	109	26	0	306.38	3.33	214.5
116	1	1.41	0.98	1.362	6	0	0	0	0	0	0	0	0	2	0	1	1	1	1	41.9	1	0	128	22	0	147.22	3.55	254.6
117	0	2.11	1.04	1.321	10	0	0	1	0	0	0	0	1	3	0	1	1	1	1	72.6	0	0	126	39	0	85.81	6.24	147.7
118	0	1.79	0.98	0.388	19	0	0	0	0	0	0	0	0	3	6	1	1	1	1	42.5	1	0	115	20	0	115.13	3.26	241.5
119	0	2.72	1.14	0.862	17	5	29.4	3	0	0	0	0	0	3	6	3	2	2	1	88.4	0	0	127	20	0	69.54	55	267.9
120	1	1.45	0.77	0.268	7	1	14.3	1	0	0	0	0	0	3	6	3	1	1	1	62.7	0	0	110	30	0	82.54	6.73	266.8
121	1	2.88	0.82	0.298	5	0	0	1	0	0	0	0	0	2	0	3	2	2	1	91.3	2	0	101	23	0	60.29	6.52	429.5
122	0	2.45	0.79	0.345	14	1	7.1	0	0	0	0	0	0	2	0	1	1	1	1	49.9	0	0	119	31	0	134.74	3.53	312
123	0	2.63	0.94	1.107	25	3	12	0	0	0	0	0	0	3	6	3	2	2	1	87.7	0	0	122	45	0	71.35	4.53	263.1
124	1	1.14	0.94	0.013	5	1	20	0	0	0	0	0	0	2	0	1	1	1	1	57.2	0	0	103	25	0	88.28	4.53	263.1
125	1	3.49	1.23	0.107	15	0	0	0	0	0	0	0	0	3	0	1	0	0	0	73.2	0	0	139	25	0	110.15	2.81	296
126	1	2.59	0.87	0.396	24	7	29.2	7	4	0	4	0	0	4	6	5	2	2	1	90.9	2	0	112	30	0	98.24	4.72	401.3
127	1	2.17	1.04	3.254	14	0	0	0	1	1	0	0	0	4	0	1	0	0	0	88.4	2	0	111	26	0	130.07	5.06	402.5
128	1	2.08	0.86	0.035	19	2	10.5	0	0	0	0	0	0	4	0	1	1	1	1	52.6	0	1	123	41	0	107.24	4.01	265.4
129	1	2.29	0.68	0.122	9	0	0	0	0	0	0	0	0	2	0	1	0	0	0	56	1	0	109	30	0	123.22	3.3	255.3
130	1	1.68	0.94	0.373	19	0	0	1	0	0	0	0	0	3	0	1	0	0	0	49.4	0	0	117	38	0	118.73	4	298.5
131	1	3.12	0.65	0.218	18	0	0	3	0	0	0	0	0	2	0	1	2	2	1	105.7	1	1	120	22	0	82.39	6.64	291.4
132	1	2.03	0.85	1.168	11	2	18.2	3	0	0	0	0	0	3	0	1	1	1	1	74.8	1	1	112	23	0	105.82	5.77	360.4
133	0	1.35	0.67	0.05	10	2	20	0	0	0	0	0	0	2	0	1	1	1	1	78	1	0	101	43	0	62.41	6	160.5
134	1	1.8	0.72	1.129	10	0	0	1	0	0	0	0	1	2	0	1	1	1	1	52.6	1	1	123	38	0	115.56	4.04	198
135	1	6.1	0.66	0	14	1	7.1	0	0	0	0	0	0	2	0	1	1	1	1	64.5	0	0	110	30	0	99.85	4.56	213.6
136	1	2.83	0.97	0.089	12	3	25	1	0	0	0	0	1	2	0	1	1	1	1	51	4	0	134	47	0	114.39	6.68	145.8
137	0	2.23	0.77	0.236	10	2	20	0	0	0	0	0	0	3	0	1	1	1	1	51.3	0	0	123	27	0	122.06	5.09	306
138	1	3.84	1.04	0.74	22	3	13.6	4	0	0	0	0	0	2	0	1	2	2	1	111	1	0	122	30	0	51.8	7.5	289.6
139	0	2.93	0.7	0.352	16	5	31.2	3	0	0	0	0	0	3	6	2	2	2	1	64.1	0	0	117	24	0	104.06	4.69	378.6
140	0	0.88	0.87	0.022	9	0	0	0	0	0	0	0	0	2	0	1	0	0	0	70.8	1	0	111	18	0	129.29	5.49	399
141	1	2.22	0.89	0.654	23	6	26.1	2	0	0	0	0	0	2	6	1	2	2	1	63.9	0	0	120	47	0	73.04	4.68	392.8
143	1	1.21	0.91	0	13	2	15.4	0	0	0	0	0	0	2	0	1	1	1	1	62	0	0	114	28	0	100.1	3.22	278.9
144	1	4.34	0.94	0.44	23	3	13	0	0	0	0	0	0	2	0	1	1	1	1	55.1	0	0	100	56	0	84.47	5.66	171.5
145	0	2.98	0.79	0.44	2	0	0	1	0	0	0	0	0	2	0	1	1	1	1	62.3	0	0	110	30	0	84.92	5.14	328.3
146	1	4.42	1.02	1.025	20	2	10	1	0	0	0	0	0	3	0	1	1	1	0	51.4	1	1	118	21	0	108.92	4.17	255.2
147	0	2.56	0.6	0.083	15	3	20	3	0	0	0	0	0	2	0	1	1	1	1	93.2	1	1	92	27	0	57.68	7.38	341.1
148	1	1.87	0.9	0.113	19	1	5.3	0	0	0	0	0	0	3	6	2	1	1	1	44.4	0	0	109	26	0	136.9	7.28	203.2
149	1	2.27	1.06	0.07	18	1	0	0	0	0	0	0	0	2	0	2	1	1	1	49.9	1	0	114	47	0	100.35	3.54	251.2
151	1	2.07	0.96	0.186	15	1	0	2	0	0	0	0	0	2	0	2	2	2	1	68.7	0	1	122	24	0	103.84	4.36	318.1
152	0	2.53	1.33	0	20	0	0	0	0	0	0	0	0	3	6	3	1	1	1	48.5	0	0	111	44	0	130.37	2.52	346.2
153	0	2	1.05	0.162	14	1	7.1	2	0	0	0	0	0	3	0	1	1	1	1	53.5	0	1	105	51	0	102.62	4.69	202.2
154	0	3.21	1.5	2.736	14	1	7.1	1	0	0	0	0	0	3	6	5	1	1	1	73.5	0	0	120	56	0	105.43	6.09	454.9
155	1	2.68	1.3	0.623	10	1	10	1	1	1	0	0	0	2	0	1	1	1	1	105.1	0	0	129	40	0	78.41	4.28	389.5
156	0	1.89	0.97	0.093	24	2	8.3	0	0	0	0	0	0	2	0	1	0	0	0	83.7	0	0	118	42	0	61.21	3.3	194.3
157	0	1.78	1.13	0.274	11	4	36.4	3	3	0	3	0	0	4	6	3	1	1	1	83.1	1	0	117	33	0	74.04	5.68	262.8
159	1	2.08	0.76	0.261	13	0	0	2	0	0	0	0	0	3	0	1	1	1	1	55.7	0	1	119	26	0	117.69	3.67	55.7
160	1	2.38	1.36	3.829	13	4	30.8	4	4	0	4	0	0	3	6	3	2	2	1	72.4	0	0	114	48	0	71.74	6.33	226.6
162	0	3.31	1.3	0.995	7	2	28.6	0	0	0	0	0	0	3	0	1	2	2	1	86.5	1	0	152	39	0	69.58	7.01	450.8
163	1	6	1.65	1.317	18	1	0	2	0	0	0	0	0	3	0	2	2	2	1	56.3	0	0	145	25	0	146.29	5.63	439.2
164	1	3.73	1.24	0.698	13	2	15.4	4	1	0	1	0	0	3	0	1	2	2	1	73.2	0	0	132	42	0	93.78	6.06	478.3
165	1	3.3	0.94	0.22	11	0	0	0	0	0	0	0	0	2	0	1	0	0	0	62.5	0	1	124	39	0	79.41	3.57	277.4
166	0	1.99	0.61	0	19	2	10.5	0	0	0	0	0	0	2	0	1	1	1	1	58.7	0	0	101	40	0	89.05	7.06	281
167	1	1.99	0.61	12.118	9	0	0	0	0	0	0	0	0	0	1	0	0	0	0	79.4	0	0	131	34	0	93.52	7.44	509.2
168	1	3.77	1.57	1.331	15	0	0	2	1	1	0	0	0	3	0	3	2	2	1	84.1	2	0	120	16	0	134.2	5.26	555.1
170	1	2.74	0.93	2.621	9	0	0	2	0	0	0	0	0	3	0	1	0	0	1	91.2	0	0	109	36	0	42.92	1.24	43.4
171	1	2.56	1.03	0.363	5	1	20	0	0	0	0	0	0	2	0	1	1	1	1	50.2	0	0	141	34	0	114.8	4.95	235.9
172	1	4.79	1.28	0.515	17	3	17.6	3	0	0	0	0	0	2	0	1	1	1	1	83.9	0	0	117	31	0	115.05	4.66	486
173	1	3.11	1.54	5.306	19	2	10.5	10	0	0	0	0	0	3	6	3	1	1	1	103.9	0	0	152	43	0	66.37	5.6	366
174	1	2.34	1.27	0.757	14	2	14.3	4	2	2	0	0	0	3	6	3	2	2	1	66.1	0	0	103	35	0	99.65	5.27	265.1
175	1	1.35	0.97	1.879	9	0	0	0	0	0	0	0	0	3	0	1	0	0	0	57.3	0	0	120	16	0	138.41	6.57	318.6
176	1	1.96	0.89	1.472	21	4	19	0	0	0	0	0	0	3	0	1	1	1	1	94	0	0	137	42	0	66.68	4.96	329.7
177	0	2.27	1.08	0	7	1	14.3	0	0	0	0	0	0	2	0	1	1	1	1	93.3	0	0	135	47	0	60.44	3.3	225.4
178	0	2.19	0.77	0.04	19	0	0	0	0	0	0	0	0	2	0	1	0	0	0	49.8	0	0	106	21	0	127.41	3.09	225
179	0	4.01	0.81	0.124	13	1	7.7	1	0	0	0	0	0	2	0	2	1	1	1	71.8	0	1	116	25	0	96.53	4.47	436
180	0	2.62	0.88	0.292	8	2	25	0	0	0	0	0	0	2	0	1	0	0	0	46.2	0	0	101	35	0	129.5	2.9	264.7
181	1	2.38	1.1	0.007	11	2	18.1	0	0	0	0	0	0	2	0	1	1	1	1	76.4	0	0	125	36	0	69.74	3.7	150.5
182	0	1.88	1.09	0.578	7	0	0	0	0	0	0	0	0	3	0	1	1	1	1	95.3	0	0	101	32	0	97.57	5.36	367.2
183	1	5.13	0.98	0	19	1	5.3	3	0	0	0	0	0	3	6	3	1	1	1	89.8	0	0	128	25	0	105.54	5.89	502.7
185	1	1.65	1.26	0.996	14	11	78.6	1	0	0	0	0	0	3	0	1	2	2	1	97.1	0	0	139	46	0	85.73	4.89	523.5
186	0	1.44	1.11	0.106	13	1	7.7	0	0	0	0	0	0	2	0	1	1	1	1	60.4	0	0	130	17	0	187.86	3.52	291.8
187	1	2.07	1.19	0.0028	20	1	5	0	0	0	0	0	0	2	0	1	1	1	1	62.2	0	0	101	24	0	107.24	3.59	219.4
188	0	2.53	1.34	0.609	7	0	0	2	0	0	0	0	0	2	6	1	1	1	1	62.5	1	1	119	36	0	119.17	4.31	343.3
189	1	1.6	1.46	0.976	30	0	0	0	0	0	0	0	0	2	0	1	1	1	1	104.5	0	0	114	44	0	82.49	5.7	239.8
190	1	3.15	0.82	1.08	14	2	14.3	3	0	0	0	0	0	4	6	3	1	1	1	61.8	0	0	145	43	0	104.2	2.96	295.3
191	1	2.23	1.69	0.237	11	0	0	0	0	0	0	0	0	2	0	1	0	0	0	54.8	0	0	95	18	0	139.65	3.9	413.9
192	1	2.35	1.03	0.15	10	1	10	1	0	0	0	0	0	2	0	1	1	1	1	47.4	2	1	115	28	0	111.17	3.28	172.8
193	1	7.7	2.9	1.224	14	4	28.6	4	0	0	0	0	0	3	6	5	2	2	1	85.4	3	0	141	32	0	115.11	7.36	537.2
194	1	4.03	0.94	0.693	15	6	40	2	0	0	0	0	0	3	0	1	2	2	1	125.9	0	1	112	32	0	46.64	8.9	392
195	1	2.94	0.93	0.333	14	3	21.4	0	0	0	0	0	0	2	0	1	1	1	1	88.7	0	0	116	22	0	112.9	4.48	376.1
196	1	3.18	0.79	0.19	7	0	0	1	0	0	0	0	0	2	0	1	1	1	1	67.3	0	0	117	32	0	112.51	6.53	358.5
197	1	2.73	1	0.417	10	2	20	0	0	0	0	0	0	2	0	1	1	1	1	87.6	0	0	125	46	0	62.83	3.1	240.4
198	1	1.83	1.25	0.441	16	1	6.3	1	1	0	0	1	0	0	0	1	0	0	0	109.7	2	1	126	32	0	87.19	3	409.6
199	0	1.15	0.83	0.151	21	0	0	0	0	0	0	0	0	2	0	1	0	0	0	62	0	0	125	19	0	75.5	13.57	275
200	1	1.23	0.86	0.482	11	2	18.2	2	0	0	0	0	0	3	0	1	1	1	1	68.1	0	0	156	47	0	77.1	6.53	195
201	0	2.09	1.11	0.092	12	1	8.3	0	0	0	0	0	0	2	0	1	1	1	1	60.7	1	0	105	26	0	97.2	3.14	209
203	1	2.88	1.09	0.45	11	1	9.1	2	0	0	0	0	0	3	0	1	1	1	1	58.1	1	0	131	52	0	98.97	5.73	279.6
204	1	2.29	1.05	0.99	12	2	16.7	4	0	0	0	0	0	2	0	1	2	2	1	43	0	0	91	28	0	164.75	3.25	231.7
206	1	2.92	1.02	0.022	12	5	41.7	3	0	0	0	0	0	3	0	1	1	1	1	85.1	0	0	99	30	0	60.81	4.93	382.1
207	1	4.05	1.02	0.243	26	2	7.7	2	0	0	0	0	0	3	0	1	1	1	1	111.7	0	0	122	37	0	72.59	2.9	433.3
208	1	2.76	1.25	0.532	15	1	6.7	2	0	0	0	0	0	3	0	1	1	1	1	85.8	0	0	134	28	0	124.43	4.48	425.4
209	1	1.08	0.88	4.75	21	1	4.8	0	0	0	0	0	0	3	0	1	1	1	1	104.7	0	0	140	19	0	83.87	10.13	474.2
210	1	2.4	0.86	3.374	17	2	11.8	9	5	0	5	0	0	3	0	3	2	2	1	101.2	0	0	104	35	0	61.29	8.17	423.3
211	1	2.57	0.93	0.317	17	1	5.9	2	0	0	0	0	0	3	6	3	2	2	1	60.3	1	1	110	28	0	121.37	4.97	302.1
212	1	1.22	0.78	1.471	20	2	10	5	3	0	3	0	0	0	6	5	1	1	1	67.2	0	0	111	27	0	96.69	4.71	271.9
213	0	0.78	0.87	0.031	9	0	0	1	0	0	0	0	0	3	0	2	1	1	1	81.4	0	0	106	25	0	116.43	5.7	236.7
214	1	1.6	0.8	0.2	6	0	0	0	0	0	0	0	0	3	0	1	0	0	0	49.8	0	0	125	45	0	87.75	4.24	136.5
215	1	2.35	1.07	0.115	24	0	0	0	0	0	0	0	0	2	0	1	1	1	1	69.7	0	0	120	47	0	73.24	4.5	258.7
216	1	3.66	1.05	1.96	11	3	27.3	5	0	0	0	0	0	3	6	1	2	2	1	119.7	0	0	138	29	0	82.12	5.2	365
217	1	2.15	0.82	0.779	11	3	27.3	4	0	0	0	0	0	3	6	3	2	2	1	113.2	0	0	141	24	0	83.19	5.6	454
218	1	3.39	0.68	2.238	13	0	0	3	1	1	0	0	0	3	0	1	1	1	1	98	0	1	120	23	0	82.23	4.22	498.9
219	1	2.35	1.1	1.468	14	5	35.7	1	0	0	0	0	1	2	0	1	1	1	1	68.3	0	0	107	27	0	112.43	6.61	417.3
220	1	2.14	0.78	0.806	13	0	0	2	0	0	0	0	0	3	0	1	1	1	1	108.6	0	0	138	43	0	76.9	5.5	305.4
221	1	1.21	0.81	0.45	22	2	9.1	4	0	0	0	0	0	3	0	1	1	1	1	79.6	0	0	117	24	0	143.4	3.39	383.6
222	0	1.02	0.99	0.7	18	0	0	1	0	0	0	0	1	3	0	1	1	1	1	67.7	0	0	132	37	0	168.42	5.25	519
223	0	1.93	1.04	0.344	11	0	0	0	0	0	0	0	0	2	0	1	0	0	0	96.4	2	0	127	24	0	112.49	6.24	387.6
224	0	2.32	0.89	1.724	11	0	0	2	1	1	0	0	0	3	6	5	0	0	0	104.6	0	0	135	22	0	69.38	2.9	245.4
225	1	1.45	0.85	1.42	17	2	11.8	2	2	2	0	0	0	4	6	3	1	1	1	90.4	0	0	161	43	0	69.29	10.4	214.6
226	1	1.94	0.73	0.105	27	1	3.7	3	0	0	0	0	0	3	6	1	1	1	1	50.9	0	1	143	48	0	103.93	5.2	191.3
227	1	2.11	0.65	0.182	17	4	23.5	6	2	0	2	0	0	3	6	1	2	2	1	74.2	0	0	100	20	0	119.35	5.56	361.3
228	1	2.64	1.03	1.02	8	0	0	3	4	0	4	0	0	2	0	1	1	1	1	102.1	0	0	140	46	0	61.6	4.77	381
229	1	1.93	0.73	0.624	13	4	30.8	3	0	0	0	0	0	3	6	1	1	1	1	60.5	0	1	131	34	0	82.43	5.78	237.2
232	0	1.57	0.68	0.041	3	1	33.3	1	0	0	0	0	1	3	0	2	1	1	1	55.9	0	0	116	44	0	82.59	7.12	171.6
233	1	3.02	0.95	0.711	12	0	0	0	0	0	0	0	0	2	0	1	1	1	1	54.9	0	1	109	22	0	101.12	4.81	267.4
234	1	3.17	0.98	0.121	16	1	6.2	3	1	0	1	0	1	3	6	1	1	1	1	64.2	1	0	129	56	0	77.97	6.81	269
235	1	0.81	1.04	2.939	17	0	0	1	0	0	0	0	1	2	0	1	0	0	0	75	0	0	135	44	0	77.62	8.6	407.2
236	0	5.11	0.7	0.543	9	1	11.1	1	0	0	0	0	0	3	6	1	1	1	1	110.6	2	1	130	30	0	67.28	7.31	355.4
237	1	2.74	0.68	0.439	25	8	32	5	0	0	0	0	0	3	6	5	2	2	1	98	0	0	127	43	0	51.74	6.59	357.9
238	1	3.02	0.9	0.454	15	4	26.7	1	0	0	0	0	1	3	0	1	2	2	1	98.5	0	0	140	37	0	65.6	7.17	475.5
239	0	1.75	1.23	2.241	4	1	25	0	0	0	0	0	0	2	6	1	2	2	1	69.2	0	0	131	48	0	119.37	5.67	336.7
240	1	1.78	1.05	1.988	7	3	0	4	4	0	0	4	0	3	6	3	2	2	1	85.6	1	0	110	28	0	66.35	6.25	390.6
241	0	0.96	0.76	1.04	8	0	0	2	0	0	0	0	0	2	0	1	1	1	1	71.3	0	0	131	43	0	120.48	4.77	335.5
242	1	4.84	1.37	0.478	9	3	33.3	3	0	0	0	0	0	2	0	1	2	2	1	53.1	0	0	166	43	0	156.61	4.39	416.7
244	0	2.37	0.82	0.118	25	3	12	0	0	0	0	0	0	2	0	1	1	1	1	53.4	0	0	123	54	0	87.56	6.63	279
245	0	1.08	0.96	0.12	13	0	0	0	0	0	0	0	0	2	0	1	0	0	0	82.3	0	0	123	25	0	94.53	6.26	366
246	1	1.7	1.51	1.045	18	2	11.1	1	0	0	0	0	1	2	0	1	1	1	1	74.5	0	0	145	49	0	94.65	6	379
247	1	1.53	0.87	0.085	12	1	8.3	0	0	0	0	0	0	2	0	1	0	0	0	64	0	0	117	25	0	163.55	5.82	288.8
248	1	2	1.28	0.254	15	2	13.3	2	0	0	0	0	2	2	0	2	1	1	1	72.5	0	0	129	41	0	131.01	5.66	285.7
249	1	3.74	1.12	0.278	18	1	5.6	3	0	0	0	0	0	2	6	2	0	0	0	68.9	2	0	133	49	0	75.95	4.66	283
250	1	2.2	1.77	2.508	11	0	0	0	0	0	0	0	0	2	0	1	0	0	0	101.2	1	0	97	28	0	87.12	5.21	473
251	1	1.92	1.34	1.544	9	0	0	1	0	0	0	0	1	2	0	1	0	0	0	79.2	0	0	148	20	0	147.23	9.2	440
252	1	2.63	0.85	0	11	0	0	0	0	0	0	0	0	2	0	1	0	0	0	52.7	0	0	98	22	0	98.32	4.7	241
254	1	2.22	1.23	0.093	13	1	0	0	0	0	0	0	0	2	0	1	0	0	0	82.3	0	0	120	43	0	71.47	4.97	263
256	1	3.26	1.35	7.567	11	1	9.1	2	0	0	0	0	2	3	0	1	1	1	1	67.5	0	0	137	63	0	89.45	9.58	369
257	1	2.19	1.64	3.573	11	1	9.1	0	0	0	0	0	0	2	0	1	0	0	0	66.7	0	0	105	48	0	79.31	2.48	270
258	1	2.79	1.25	6.19	22	0	0	0	0	0	0	0	0	2	0	1	0	0	0	74.2	0	0	132	18	0	113.25	2.93	280
259	1	2.79	1.25	0.343	23	6	26.1	5	0	0	0	0	0	3	6	5	2	2	1	74.2	0	0	129	47	0	73.38	2.93	280
260	1	2.81	1.31	0.765	13	3	23.1	1	0	0	0	0	0	3	5	1	2	2	1	100.4	0	0	130	36	0	94.28	5.97	347
261	1	1.9	1.55	2.64	18	6	33.3	4	0	0	0	0	0	2	6	5	2	2	1	95.2	0	0	122	44	0	42.17	4.2	304
262	1	2.27	0.93	0.021	10	0	0	2	0	0	0	0	0	2	0	1	1	1	1	72.1	4	0	105	24	0	80.74	3.59	315.7
263	1	3.87	1.89	10.656	12	3	25	0	0	0	0	0	0	2	0	1	1	1	1	130	0	0	123	56	0	48.48	15.24	245
264	1	3.36	1.53	0.172	12	1	8.3	1	0	0	0	0	0	2	0	1	1	1	1	55.3	0	1	125	20	0	131.59	4.66	286
265	1	3.57	1.46	2.111	13	2	15.4	3	0	0	0	0	0	3	6	3	1	1	1	75.3	2	0	135	31	0	129.97	5.34	317
266	1	2.24	0.96	0.07	14	1	7.1	0	0	0	0	0	1	3	6	1	1	1	1	60	4	1	120	33	0	125.03	3.5	332
267	1	2.96	0.89	0.945	15	0	0	4	0	0	0	0	0	5	6	3	1	1	1	46.4	0	0	160	29	0	117.55	3.9	312
268	1	4.78	1.25	0.735	6	1	16.7	1	0	0	0	0	2	3	0	1	1	1	1	94	2	1	138	38	0	112.11	5.45	426
269	1	2.57	0.39	0.613	37	2	5.4	0	0	0	0	0	0	4	6	1	1	1	1	77	2	1	109	18	0	74.54	5.36	452
270	1	0.96	1.43	1.329	19	2	10.6	1	0	0	0	0	0	3	6	1	1	1	1	71	0	0	109	30	0	161.98	6.74	416
272	1	0.28	1.37	10.38	9	0	0	0	0	0	0	0	0	2	0	1	0	0	0	86	1	0	102	20	0	92.68	3.8	402
273	1	4.38	0.98	4.239	18	1	0	0	0	0	0	0	0	3	0	1	2	2	1	59.4	0	0	137	50	0	76.04	9.8	418
274	1	2.14	0.84	0	12	2	16.7	0	0	0	0	0	1	0	0	1	1	1	1	72.2	1	0	115	34	0	79.82	5.2	320
275	1	2.25	0.93	0.518	8	0	0	1	0	0	0	0	2	2	0	1	0	0	0	115.3	1	1	136	22	0	86.86	5.6	321
276	1	1.49	1.11	0.315	11	1	9.1	0	0	0	0	0	0	2	0	1	1	1	1	36.1	0	0	159	44	0	150.13	5.1	265.5
277	1	1.18	1.11	4.795	24	0	0	3	0	0	0	0	0	2	0	1	1	1	1	73	0	0	156	24	0	127.04	4.66	286
278	1	3.76	0.21	1.412	5	0	0	1	2	0	1	1	1	3	0	1	1	1	1	66.3	2	1	136	13	0	80.11	6.7	233
279	1	4.76	3.4	1.877	16	5	31	2	4	3	0	1	0	3	5	2	2	2	1	118.4	2	0	125	45	0	65.14	7.2	438
280	1	1.7	0.98	1.619	9	1	11.1	0	2	0	2	0	2	2	0	3	1	1	1	100.2	0	0	148	21	0	92.03	5.34	418
281	1	1.91	1.21	0.36	12	0	0	0	0	0	0	0	0	2	0	1	0	0	0	84.7	0	0	113	28	0	118.73	5.87	366
282	1	5.79	1.57	0.91	8	2	25	1	0	0	0	0	0	2	0	1	1	1	1	73.7	0	0	135	36	0	130.18	5.72	447
283	1	1.61	0.9	0.676	23	9	39.1	3	0	0	0	0	0	3	0	1	2	2	1	83.9	2	0	124	37	0	60.97	3.85	306
284	1	2.06	0.87	5.463	14	3	21.4	1	0	0	0	0	0	2	0	1	1	1	1	70.5	0	0	124	23	0	124.52	8.16	504
285	1	3.74	1.04	0.397	26	4	15.4	2	1	1	0	0	0	3	0	1	1	1	1	52	0	0	120	21	0	137.57	4.4	320.3
288	1	1.69	1.08	1.78	12	0	0	0	0	0	0	0	0	2	0	1	3	3	1	34.1	0	0	138	58	0	108.11	5.54	278
289	1	2.89	1.03	0.98	10	3	0	0	0	0	0	0	0	2	0	1	1	1	1	53.1	0	0	131	33	0	80.06	3.03	305
290	1	3.32	0.81	0.663	13	4	0	0	0	0	0	0	0	3	0	1	2	2	1	57	0	0	121	28	0	102.72	5.6	267
291	0	2.32	1.15	0.267	18	0	0	0	0	0	0	0	0	2	0	1	0	0	0	34.5	0	0	105	42	0	133.64	6.26	197
292	1	3.57	1.38	0.382	14	2	0	2	0	0	0	0	0	2	0	2	2	2	1	78.5	0	0	135	48	0	95.14	6.48	342
293	1	3.72	0.85	0.404	12	1	0	1	0	0	0	0	0	3	5	2	2	2	1	50	0	0	125	26	0	138.26	5	303
294	1	2.8	0.97	0.285	6	0	0	0	1	0	0	1	0	2	0	1	0	0	0	53.4	0	1	134	22	0	99.34	4.86	275
296	0	1.91	0.88	0.08	20	0	0	0	0	0	0	0	0	2	0	2	1	1	1	47.6	4	0	107	35	0	107.24	3.4	223
297	1	2.02	1.22	1.713	14	0	0	2	0	0	0	0	0	2	0	1	0	1	1	57.6	0	0	101	14	0	115.7	5.6	377
298	1	1.98	0.88	3.393	22	4	18.2	4	0	0	0	0	0	2	5	2	1	1	1	112	0	0	129	49	0	69.96	9.8	342
299	1	1.37	0.8	0.942	24	0	0	0	0	0	0	0	0	2	0	1	0	1	1	75.6	0	0	146	30	0	91.45	2.92	299
300	1	3.94	0.97	2.024	18	6	33.3	5	2	0	2	0	0	3	0	2	1	1	1	93.1	0	0	128	31	0	79.2	5.45	417
301	1	5.65	1.68	12.224	13	1	7.7	0	0	0	0	0	0	2	0	1	1	1	1	55.8	0	0	128	40	0	138.65	3.3	190
303	1	1.04	0.86	2.202	10	0	0	0	0	0	0	0	0	2	0	1	1	1	1	95	0	0	109	28	0	91.36	7.5	445
304	1	3.68	0.88	0.15	14	2	14.3	1	0	0	0	0	0	2	0	1	1	1	1	76.8	0	0	127	43	0	66.02	5.64	316
308	0	1.17	1.1	0.026	22	2	9.1	0	0	0	0	0	0	2	0	1	1	1	1	72.2	0	0	112	44	0	70.9	5.11	183
309	0	2.74	0.99	0.577	6	0	0	0	0	0	0	0	0	2	0	1	1	1	1	45.6	0	0	125	44	0	112.25	4.62	233
310	1	2.4	0.97	0.271	22	0	0	0	0	0	0	0	0	2	5	1	0	0	0	75	0	0	138	22	0	141.27	4.8	303
311	1	2.57	0.84	0.773	6	1	16.7	2	0	0	0	0	0	2	0	1	2	2	1	84.5	0	0	112	38	0	71.94	7.2	384
312	1	1.14	0.96	0.542	16	4	25	3	0	0	0	0	2	3	6	3	2	2	1	109.2	1	0	127	38	0	56.64	6.64	371.5
313	1	2.72	1.11	1.566	12	0	0	3	0	0	0	0	0	3	6	1	0	0	0	37.8	1	1	110	16	0	173.2	4.29	259
314	1	2	1.06	0	11	0	0	0	0	0	0	0	0	2	0	1	0	0	0	83.3	1	0	130	20	0	106.31	2.91	468
315	0	5.35	1.02	0.754	8	2	25	1	0	0	0	0	0	2	0	1	2	2	1	85.3	1	0	136	30	0	102.31	5.07	392.2
316	1	3.24	1.01	0.013	18	0	0	0	0	0	0	0	0	2	0	1	1	1	1	53.9	2	0	119	38	0	106.84	4.16	316
317	0	2.76	1.12	0	13	3	0	1	0	0	0	0	0	2	0	1	1	1	1	55.3	0	0	139	25	0	214.86	4.6	496
318	0	4.02	0.68	0	12	4	33.3	3	0	0	0	0	0	3	6	3	2	2	1	63.9	0	0	110	36	0	78.27	4.32	300
319	1	3.33	1.04	0.678	9	0	0	1	0	0	0	0	0	2	0	1	1	1	1	63	2	1	103	34	0	99.39	6.87	315
320	1	2.18	0.99	3.596	8	0	0	0	0	0	0	0	0	2	0	1	0	0	0	63.8	0	0	108	29	0	116.41	6.26	314
321	0	1.39	0.7	0	10	6	60	1	0	0	0	0	0	2	6	3	2	2	1	83.9	0	0	104	26	0	83.56	5.83	378
322	1	1.43	0.83	0.271	14	1	7.1	2	0	0	0	0	0	2	0	1	1	1	1	73.2	0	0	118	50	0	75.84	4.87	3.53
323	0	2.93	1.01	0.622	7	0	0	0	0	0	0	0	0	2	0	1	1	1	1	78.1	0	0	125	35	0	135.6	4.88	4.25
324	0	2.31	0.65	0.091	7	0	0	0	0	0	0	0	0	2	0	1	0	0	0	49.3	0	0	120	42	0	101.84	4.31	207.3
325	1	2.14	0.62	3.308	14	2	14.3	1	0	0	0	0	0	2	0	1	1	1	1	87.8	0	0	117	22	0	100.01	5.34	394
327	1	3.49	0.86	0	40	1	2.5	0	0	0	0	0	0	3	0	1	0	0	0	83.9	0	0	100	36	0	99.1	5.91	376.4
328	1	2	0.69	1.41	21	0	0	0	0	0	0	0	0	3	0	1	0	0	0	63.2	0	0	117	22	0	100.53	4.36	253.4
329	0	1.92	0.89	1.142	13	5	38.5	4	0	0	0	0	0	4	6	5	2	2	1	52.4	0	0	130	31	0	137.01	6.15	340
330	1	1.16	0.84	0.088	22	0	0	1	0	0	0	0	1	3	0	1	1	1	1	65	0	0	115	26	0	83.43	5.47	439
331	1	1.07	1.48	4.207	12	4	33.3	5	0	0	0	0	0	4	6	5	2	2	1	106.2	0	0	138	32	0	69.11	8.12	382.4
332	1	1.74	0.98	1.52	15	2	13.3	4	4	2	0	2	0	3	0	3	2	2	1	118.7	0	0	130	27	0	70.26	3.33	3.59
333	1	1.08	0.83	0.09	13	4	30.8	0	0	0	0	0	0	3	0	1	2	2	1	66.2	1	0	125	25	0	136.75	5.29	333.8
334	1	1.55	1.27	7.454	12	0	0	0	0	0	0	0	0	2	0	1	0	0	0	93.8	0	0	132	18	0	111.99	6.89	384.5
335	1	1.52	0.72	1.036	12	2	16.7	6	0	0	0	0	0	3	6	3	2	2	1	108.7	0	0	185	23	0	67.52	7.5	458.2
336	1	1.41	1.12	5.848	15	4	26.7	4	2	0	2	0	0	3	6	3	2	2	1	94.1	0	0	137	45	0	67.02	7.21	416.9
337	1	2.11	1.13	11.275	8	1	12.5	0	0	0	0	0	0	3	0	1	1	1	1	96.1	0	0	119	57	0	63.74	8.8	503
338	1	1.33	1.05	0.345	18	3	16.7	5	1	0	1	0	0	3	0	1	1	1	1	81.5	1	1	124	25	0	91.99	5.31	315
339	0	1.61	0.82	0.078	8	0	0	0	0	0	0	0	0	2	0	1	1	1	1	82.8	0	0	118	22	0	94.66	5.39	353.5
340	0	1.74	1	3.48	37	2	5.4	0	0	0	0	0	0	2	0	1	1	1	1	49	0	0	83	62	0	87.37	4.51	264.9
341	1	1.98	1.34	0.426	8	0	0	4	3	3	0	0	0	0	6	1	1	1	1	44.4	2	1	130	26	0	139.59	2.79	224.9
342	1	1.29	0.91	11.932	10	6	60	0	0	0	0	0	0	3	6	5	2	2	1	70.6	0	0	120	27	0	124.03	6.8	370.6
343	1	2.35	1.02	0.308	9	0	0	1	0	0	0	0	0	2	0	1	1	1	1	46.2	0	0	113	18	0	121.48	3.49	263.5
344	1	2.8	0.96	1.416	12	5	41.7	1	0	0	0	0	0	2	0	1	1	1	1	38.2	1	0	111	27	0	120.62	2.9	193.9
345	0	1.54	1.13	2.441	12	2	16.7	1	0	0	0	0	0	3	0	1	1	1	1	4.16	0	0	121	30	0	2601.92	102.2	535.4
346	1	1.78	1.06	4.45	6	0	0	0	0	0	0	0	0	2	0	1	0	0	0	115.3	1	0	132	20	0	88.33	7.49	323.3
347	1	2.63	1.07	0.283	33	0	0	3	2	2	0	0	0	3	0	1	1	1	1	57.3	0	1	103	19	0	103.77	2.65	299.7
348	1	3.11	1.12	0.035	28	0	0	0	0	0	0	0	0	2	0	1	0	0	0	95.3	0	0	105	49	0	42.93	9.2	342.9
349	1	3.38	0.98	0.168	9	1	11.1	2	1	1	0	0	0	3	0	3	1	1	1	73	1	0	133	47	0	112.82	7.21	316.8
350	1	0.55	1.25	1.834	17	3	17.6	8	2	0	0	2	0	3	6	3	1	1	1	79.4	0	0	148	17	0	76.12	3.7	262.7
351	0	3.1	0.79	0.029	7	0	0	0	0	0	0	0	0	2	0	1	1	1	1	53.7	0	0	105	24	0	130.99	5.15	249.8
352	1	1.72	1.24	0.738	10	1	10	2	0	0	0	0	0	2	0	1	1	1	1	79.3	0	0	133	37	0	86.91	9.29	262.5
353	1	1.11	1.25	0.864	11	2	18.2	1	0	0	0	0	0	2	0	1	1	1	1	87.9	1	0	143	37	0	98.01	4.61	353.7
354	1	4.89	1.23	1.786	13	0	0	4	2	0	2	0	0	3	6	3	1	1	1	78.4	0	0	139	49	0	63.1	3.6	211
355	1	2.53	1.39	0.634	11	1	9.1	2	0	0	0	0	0	3	0	3	1	1	1	79.6	0	0	132	49	0	71.71	5.9	332.8
356	1	4.67	1.25	0	23	6	26.1	3	1	1	0	0	0	3	0	1	1	1	1	97	0	1	130	46	0	68.9	4.5	262
357	1	1.27	0.79	4.652	16	0	0	0	0	0	0	0	0	2	0	1	0	0	0	53.3	0	0	122	25	0	117.3	3.6	104.4
358	1	4.57	1.4	2.096	12	1	8.3	1	0	0	0	0	0	3	0	1	1	1	1	55	0	0	143	41	0	157.14	3.32	341.8
359	0	2.23	1.44	0.467	12	0	0	2	0	0	0	0	0	2	6	1	0	0	0	92.3	0	0	133	31	0	101.24	4.3	350.3
360	0	1.83	0.8	0.03	7	0	0	0	0	0	0	0	0	2	0	1	0	0	1	74.4	0	0	117	15	0	115.73	4.99	401
361	0	3.61	1.01	0	13	4	30.8	1	0	0	0	0	0	3	0	2	2	2	1	71.8	0	0	126	46	0	108.7	6.89	337.7
362	0	1.71	0.99	0.068	7	0	0	0	0	0	0	0	0	3	0	1	0	0	0	72.9	0	0	130	37	0	84.2	5.95	194
364	0	1.96	1.38	0.087	7	0	0	2	0	0	0	0	0	3	6	1	1	1	1	83	0	0	103	40	0	71.8	5.2	233.9
365	0	3.52	0.83	0.626	14	1	7.1	6	0	0	0	0	0	3	0	3	1	1	1	65.7	0	0	115	25	0	91.5	4.69	296
366	1	2	1.15	0.7	9	1	11.1	2	0	0	0	0	0	2	0	1	2	2	1	68	0	0	100	41	0	89.81	3	186
368	1	2.82	0.96	0.539	12	0	0	4	1	1	0	0	0	2	0	1	1	1	1	58.4	0	0	110	20	0	112.79	5.81	247.4
369	0	1.11	1.07	0.283	17	7	41.2	5	2	0	0	2	0	0	0	1	2	2	1	100.7	0	0	136	21	0	109.01	6.45	396.8
371	1	2.03	1.04	0.74	9	0	0	0	0	0	0	0	3	2	0	1	1	1	0	88.5	0	0	125	24	0	82.22	4.28	314.8
372	1	2.24	1.06	1.451	7	1	14.3	2	3	2	1	0	0	3	0	1	1	1	1	56.8	2	1	128	14	0	130.97	3.98	356.2
373	1	3.45	0.79	0.333	14	6	42.9	1	3	0	0	3	0	2	0	3	1	1	1	65.5	1	0	128	42	0	71.96	3.33	258.8
374	1	2.04	1.15	0.417	18	3	16.7	5	0	0	0	0	0	3	6	3	1	1	1	49.3	0	1	122	27	0	123.41	5.29	233.5
375	0	2.13	0.94	0.638	8	1	12.5	6	1	0	1	0	0	3	6	3	2	2	1	56	1	0	108	20	0	112.02	4.8	241.4
376	1	4.7	1.34	0.697	12	1	8.3	0	0	0	0	0	0	2	0	1	1	1	1	42.5	0	0	117	33	0	139.51	3.14	208.1
377	1	1.33	0.89	0.028	9	0	0	0	0	0	0	0	0	0	0	1	0	0	0	57.3	0	0	101	22	0	105.5	4.39	254.5
378	0	2.33	1.21	0.083	9	0	0	0	0	0	0	0	0	2	0	1	1	1	0	80.5	2	0	138	33	0	103	2.6	425
380	1	2.29	0.74	0.252	29	3	10.3	2	0	0	0	0	0	2	6	1	1	1	0	99.3	0	0	125	33	0	80.85	5.5	344.1
383	1	1.02	1.05	5.75	9	0	0	0	0	0	0	0	1	3	0	1	1	1	0	64.6	0	0	131	43	0	80.06	3.38	288.7
385	1	2.39	1.2	0.172	27	0	0	1	0	0	0	0	0	3	0	1	1	1	0	78.1	0	0	126	47	0	59.76	7.73	337.1
387	0	3.77	0.78	0.181	11	3	27.3	2	0	0	0	0	0	3	0	3	1	1	1	54.2	1	1	109	28	0	115.58	3.9	332.8
388	1	2.78	0.62	0.556	14	1	7.1	1	1	0	1	0	0	3	0	1	1	1	0	62.7	1	0	130	21	0	142.4	4.55	358.9
389	0	2.41	0.85	0.178	11	0	0	1	0	0	0	0	0	2	0	1	1	1	1	62.9	1	0	123	23	0	116.68	5.5	221.4
390	0	2.7	0.85	1.003	12	1	8.3	7	1	0	0	1	0	4	6	3	1	1	1	91.3	1	0	123	49	0	52.1	9.34	277
391	0	3.11	0.93	1.82	10	0	0	3	2	0	1	1	0	3	6	3	1	1	1	92.2	0	0	120	23	0	104.58	5.8	486.4
392	1	3.22	1.43	0.579	12	1	8.3	0	0	0	0	0	0	2	0	1	1	1	1	69.6	0	0	132	48	0	126.82	6.62	414.8
393	1	3.01	1.03	0.109	8	1	12.5	0	0	0	0	0	0	2	0	1	0	1	1	85.6	0	0	120	47	0	82.85	5.84	300
394	1	4.37	1.22	16.331	16	1	6.25	0	1	1	0	0	0	2	0	1	1	1	0	74.6	0	0	103	44	0	61.89	7.94	324.7
395	1	2.11	1.09	5.773	24	4	16.7	1	0	0	0	0	0	2	0	1	1	1	1	66.5	0	0	102	46	0	75.37	9.52	220.3
467	1	2.59	2.24	3.24	26	1	3.8	0	0	0	0	0	0	2	0	1	0	0	0	85.9	0	0	112	21	0	114.17	7.66	431.7
471	1	1.9	1.38	4.096	8	2	25	2	0	0	0	0	0	3	6	1	1	1	1	97.3	1	0	143	25	0	85.88	6.7	325.4
472	1	2.98	0.87	6.211	21	2	9.5	2	2	0	2	0	0	5	6	3	1	1	1	114.8	0	0	129	49	0	43.92	12.51	324.6
473	1	2.33	1.19	2.469	16	0	0	0	0	0	0	0	0	2	0	1	0	0	0	100.8	2	0	151	16	0	90.79	9.64	444.2
474	1	2.63	1.17	0.29	12	2	16.7	0	1	0	0	1	1	2	6	2	1	1	1	72.5	1	0	113	38	0	110.75	4.49	419.3
475	1	2.02	0.72	0.364	18	4	22.2	0	0	0	0	0	0	2	0	1	1	1	1	54.4	0	0	116	40	0	113.39	2.88	171.9
480	1	3.62	0.93	0.05	12	0	0	0	0	0	0	0	0	2	2	2	1	1	1	50.2	0	0	98	45	0	118.71	5.84	252.2
482	1	2.92	1.38	2.646	8	0	0	2	0	0	0	0	0	2	0	1	1	1	1	77	0	0	153	64	0	77.39	8.1	295.3
483	1	3.89	1.17	1.073	5	0	0	0	0	0	0	0	0	6	3	3	1	1	1	45.7	1	0	129	26	0	165.69	6.54	398.4
484	1	2.33	0.71	0.152	19	0	0	0	0	0	0	0	0	2	0	1	0	0	0	74.2	1	0	107	32	0	100.26	5.2	315.7
485	1	3.36	1.07	0.157	10	3	30	0	0	0	0	0	0	2	0	1	1	1	1	52.3	1	1	135	31	0	98.05	3.4	223.6
486	1	3.37	1.14	0.099	11	3	27.3	3	0	0	0	0	0	2	0	2	1	1	1	91.6	1	0	148	29	0	122.22	3.63	334.9
487	0	1.91	0.87	0.024	28	0	0	0	0	0	0	0	0	2	0	1	0	0	0	65.8	1	0	121	21	0	85.09	5.5	218.6
488	1	1.11	1.48	0.265	19	6	31.6	2	0	0	0	0	0	2	0	1	1	1	1	79.4	2	0	131	47	0	90.62	5.27	321.8
489	1	3.29	1.52	2.347	12	1	8.3	0	0	0	0	0	0	2	0	1	1	1	1	72	0	0	170	62	0	70.22	5.3	283.6
491	1	2.23	1.3	2.474	8	1	12.5	3	3	0	3	0	0	2	3	2	1	1	0	98.8	0	0	105	21	0	127.41	5.03	381.4
492	1	0.65	0.76	2.316	21	3	14.3	9	8	0	0	8	0	3	3	3	1	1	1	62.9	0	0	128	19	0	100.56	5.45	276.1
493	1	1.1	1.49	4.241	28	0	0	0	0	0	0	0	0	2	0	1	1	1	1	88.8	0	0	152	15	0	152.36	8.12	469.4
496	1	2.94	1.48	0.6	16	2	12.5	3	1	0	0	1	0	3	3	2	1	1	0	76.6	1	0	149	57	0	69.67	5.71	350.8
497	1	1.91	1.13	1.971	10	0	0	5	3	0	3	0	0	3	6	3	1	1	1	100.3	0	0	124	16	0	76.03	4.69	440.7
498	1	2.81	1.2	1.318	15	0	0	0	0	0	0	0	0	3	0	1	0	0	0	49	0	0	120	33	0	130.13	2.72	306.6
500	1	3.82	1.21	0.375	12	4	33.3	0	0	0	0	0	0	2	0	1	1	1	1	62.2	2	0	129	36	0	124.99	3	265.6
501	1	3.99	0.69	0	19	1	5.3	4	0	0	0	0	0	2	0	2	1	1	1	89.6	0	0	119	51	0	70.86	4.67	440.5
502	1	2.8	1.03	0.445	7	4	57.1	1	0	0	0	0	0	2	6	2	3	3	1	88.4	0	0	125	41	0	101.93	4.92	412.9
503	1	5.33	1.43	1.737	5	3	0	0	0	0	0	0	0	0	0	1	3	3	1	125.4	1	0	131	37	0	48.09	7.2	502.3
508	1	0.92	1.18	2.654	9	0	0	2	0	0	0	0	1	2	6	1	1	1	1	78.7	0	0	131	21	0	141.35	3.5	322.1
509	1	3.51	1.02	0.018	13	0	0	0	0	0	0	0	0	2	0	1	0	0	0	65	2	0	124	19	0	131.66	4.41	268
510	1	4.27	1.03	0	17	4	23.5	0	0	0	0	0	0	2	0	1	1	1	1	52.1	0	0	123	41	0	105.29	4.74	361.7
511	1	1.38	0.35	0.375	6	0	0	2	0	0	0	0	0	4	3	3	0	0	0	59	1	1	116	16	0	135.72	3.32	458.9
512	1	1.71	1.25	0.065	9	0	0	0	0	0	0	0	0	2	0	1	0	0	0	62.4	0	0	131	23	0	95.08	3.14	256
513	1	3.05	1.13	2.316	13	2	15.4	2	0	0	0	0	0	3	0	2	1	1	0	100.9	2	0	113	38	0	93.26	6.06	451.6
514	1	1.74	0.73	0.199	16	1	6.3	2	0	0	0	0	0	2	0	1	1	1	1	58.3	1	0	131	23	0	100.71	3.59	215.9
515	0	1.13	1	0.084	19	3	15.8	0	0	0	0	0	0	2	0	2	1	1	1	68.2	0	0	90	33	0	65.61	3.87	202.2
518	0	3.41	1.31	0.168	15	2	13.3	2	0	0	0	0	1	2	0	2	1	1	1	47.7	1	0	110	22	0	129.32	4.88	318.8
519	1	1.83	1.3	2.531	12	4	33.3	3	2	0	0	2	0	2	3	2	2	2	1	102.8	0	0	123	36	0	58.17	10.35	400.1
520	1	3.33	1.16	0	13	1	7.7	0	0	0	0	0	0	2	0	1	0	1	1	70.8	0	0	128	35	0	104.66	3.7	313.1
521	1	2.81	0.89	0.852	19	0	0	4	1	0	1	0	0	2	3	2	1	1	0	84.7	0	0	152	22	0	111.38	4.1	185
523	1	4.97	1.51	0.402	26	0	0	2	2	2	0	0	0	2	0	1	1	1	1	78.8	2	0	144	21	0	81.73	2.74	399.7
524	1	3.09	0.94	12.134	11	0	0	2	0	0	0	0	0	2	0	1	1	1	1	131.9	0	0	144	61	0	58.94	16.54	380.9
525	0	2.94	1.03	0.917	14	1	7.1	2	0	0	0	0	0	2	0	2	2	2	1	55	2	0	101	27	0	112.77	4.01	316.4
526	0	2.05	1.41	1.15	7	1	14.3	1	0	0	0	0	0	2	6	2	1	1	1	86.3	4	0	141	53	0	56.91	5.89	473.4
528	1	1.98	0.91	0.346	14	2	14.3	2	0	0	0	0	2	2	6	2	1	1	1	58.7	1	0	109	32	0	103.87	5	321.1
529	1	1.26	1.31	2.06	11	0	0	7	9	0	9	0	0	2	6	3	2	2	1	68.3	0	0	126	17	0	84.73	3.38	234.5
531	1	1.88	1.17	0.412	9	3	33.3	1	0	0	0	0	0	2	0	1	1	1	1	83.8	1	0	121	45	0	108.76	5.54	551.9
533	1	2.68	0.95	0.449	11	3	27.3	5	1	0	1	0	0	2	6	3	2	2	1	127	0	0	123	27	0	80.44	7.68	454.4
534	1	9.41	0.98	5.52	11	3	27.3	0	0	0	0	0	0	2	0	2	1	1	1	79.6	0	0	106	68	0	59.58	16.84	480.3
535	1	1.69	1.08	0.191	17	12	70.6	2	0	0	0	0	0	2	5	2	3	3	1	96.9	4	0	131	25	0	89.04	7.28	384.9
536	1	2.71	0.87	0.146	2	0	0	0	0	0	0	0	0	2	0	1	0	0	0	72.9	0	0	122	22	0	85.46	4.21	301.5
537	1	2.14	1.27	0.376	8	0	0	0	0	0	0	0	0	2	0	1	0	0	0	70.3	0	0	128	14	0	127.86	8.83	436
538	1	3.5	2.05	0.341	16	3	18.8	0	0	0	0	0	0	2	0	1	2	2	1	54.2	0	0	127	40	0	118.63	5.49	253.3
539	0	2.53	1.53	0	7	1	14.3	0	0	0	0	0	0	2	0	1	1	1	1	82.9	1	0	129	54	0	94.42	5.13	345.6
540	1	2.15	0.99	0	27	2	0	1	0	0	0	0	0	2	0	2	0	0	0	49.6	0	0	115	25	0	138.17	3.03	235.3
541	1	1.91	0.9	0.307	21	1	0	0	0	0	0	0	0	2	0	2	1	1	1	61	0	0	120	48	0	96.19	5.18	263.4
542	1	2.07	0.84	0.284	23	0	0	0	0	0	0	0	0	2	0	1	0	0	0	154	2	0	108	24	0	32.29	3.29	728.9
543	1	2.44	0.9	0.321	15	4	26.7	0	0	0	0	0	0	2	0	1	2	2	1	94	2	0	115	38	0	94.76	4.95	288.2
545	1	2.48	0.82	0.204	14	2	14.3	0	0	0	0	0	0	2	0	2	0	0	0	86.5	2	0	125	27	0	94.8	4.3	323.4
546	1	1.55	0.84	0.203	28	6	21.4	2	1	0	0	1	0	2	0	2	2	2	1	67.8	2	0	134	35	0	120.01	3.33	461.3
547	1	4.63	1.24	2.37	20	0	0	1	0	0	0	0	0	2	0	2	1	1	1	101	0	0	135	44	0	99.37	8.1	395.2
549	0	1.65	1.32	0.677	14	0	0	0	0	0	0	0	0	2	0	2	0	0	0	59.3	1	0	130	26	0	136.67	5.22	461.7
550	1	2.43	1.08	0.466	25	0	0	4	1	0	0	1	0	2	0	2	1	1	1	80	0	0	110	22	0	103.41	6	392
552	1	2.65	1.49	1.18	15	4	26.7	4	0	0	0	0	0	2	0	2	3	3	1	93.9	0	0	138	46	0	86.35	5.12	418
553	1	3.67	0.97	0.267	36	2	5.6	2	1	1	0	0	0	2	4	2	2	2	1	73.8	1	0	115	25	0	129.38	4.19	449.4
554	1	2.7	0.98	0.06	34	0	0	0	0	0	0	0	0	2	0	2	1	1	1	74.5	0	0	96	19	0	109.87	5.39	366.1
555	1	1.55	1.04	0.487	20	0	0	0	0	0	0	0	0	2	0	2	0	0	0	48.1	2	0	107	17	0	109.61	3.67	328.9
556	1	2.37	1.03	0.5	16	1	6.6	2	0	0	0	0	0	2	0	2	2	2	1	56.5	0	0	116	24	0	96.59	4.6	373.4
558	1	2.7	0.92	1.204	11	2	18.2	3	0	0	0	0	0	3	6	2	1	1	1	95.1	0	0	120	21	0	107.74	5.93	462.9
559	1	2.2	0.91	0	19	2	10.5	2	0	0	0	0	0	2	0	1	2	2	1	54	0	1	115	41	0	91.05	2.83	192.8
560	1	1.89	0.96	0	27	5	18.5	0	0	0	0	0	0	2	0	1	1	1	1	100.8	0	0	109	39	0	80.72	5.89	401.3
562	1	2.26	1.17	0.619	22	1	4.5	1	0	0	0	0	0	2	0	1	1	1	1	93.5	2	0	130	35	0	96.69	3.25	330.8
563	0	2	1.01	1.21	24	8	33.3	6	0	0	0	0	0	2	6	2	2	2	1	100.1	0	0	125	43	0	55.22	6.85	429
565	1	0.75	1.41	0.505	4	1	25	3	0	0	0	0	0	2	6	2	3	3	1	81.6	0	0	123	39	0	64.7	6.81	220.2
567	1	1.94	1.45	0.386	13	1	7.7	3	3	0	0	3	0	2	0	1	1	1	1	64	0	0	112	36	0	67.11	4	233.2
569	1	0.96	1.18	0.067	11	0	0	0	0	0	0	0	0	2	0	1	1	1	1	76.7	0	0	120	16	0	129.25	6.81	463.7
570	1	3.46	1.19	0.255	17	2	11.8	2	0	0	0	0	0	2	6	3	2	2	1	83.4	0	0	149	47	0	78.18	5.44	451.4
571	1	2.22	1.19	0.254	43	5	11.6	6	5	3	0	2	0	2	6	3	2	2	1	57.2	0	0	96	17	0	89.93	5.1	318.6
572	1	2.63	0.93	0.983	18	2	11.1	3	0	0	0	0	0	3	6	3	3	3	1	70.7	0	0	125	35	0	108.69	3.94	334.9
573	0	1.38	1.05	0.06	26	0	0	0	0	0	0	0	0	2	0	1	1	1	1	52.7	4	0	100	14	0	107.49	3.57	226
574	1	2.19	1.18	1.119	24	5	20.8	0	1	1	0	0	0	2	0	1	1	1	1	60	1	0	115	21	0	114.05	4.41	280.5
575	1	1.72	0.92	0.226	15	0	0	3	1	1	0	0	0	0	0	2	1	1	1	66	1	1	120	22	0	77.57	2.8	285.2
576	1	3	1.11	0.429	8	0	0	2	0	0	0	0	0	2	6	2	1	1	1	102.8	1	1	110	21	0	55.67	5.99	498.7
578	1	1.02	0.9	7.219	20	0	0	5	0	0	0	0	0	2	0	2	1	1	0	75.4	0	0	127	36	0	93.73	8.8	340.5
579	1	2.32	1.23	1.06	27	0	0	0	0	0	0	0	0	2	0	1	0	0	0	73	0	0	120	20	0	113.23	3.2	482.1
581	1	4.13	1.31	8.532	15	0	0	0	0	0	0	0	0	2	0	1	0	0	0	66	0	0	90	42	0	88.49	5.83	361.3
582	1	1.9	1.08	5.925	10	1	10	1	0	0	0	0	0	2	0	2	2	2	0	87.4	0	0	103	58	0	59.43	5.45	447.3
583	1	2.85	0.97	0.734	30	3	10	5	0	0	0	0	0	2	0	1	2	2	1	109.1	1	0	120	45	0	70.69	6.41	406.5
584	0	1.04	0.65	0	10	0	0	0	0	0	0	0	0	2	0	1	0	0	0	97.8	1	1	112	22	0	90.53	6.41	339.8
585	1	2.67	0.72	0.248	23	4	17.4	3	2	0	0	2	0	2	6	2	2	2	1	77.6	0	0	135	35	0	99.86	5.24	335.5
589	1	1.6	1.14	0	8	0	0	0	0	0	0	0	0	2	0	1	2	2	1	59.3	0	0	142	61	0	80.78	5.7	444.6
591	1	1.82	0.59	0.242	21	2	9.5	2	2	0	0	2	0	2	6	2	2	2	1	54.6	2	1	113	40	0	111.06	3.28	251.1
592	1	3.03	0.74	1.74	14	7	0	3	0	0	0	0	3	2	0	3	3	3	1	111.8	0	0	176	40	0	55.17	3.8	295.4
593	1	3.37	1.39	0	21	2	9.5	1	0	0	0	0	0	2	0	2	2	2	1	70.4	1	0	166	45	0	75.48	3.21	305.7
595	1	1.61	0.75	0.485	30	1	3.3	3	1	0	1	0	0	3	6	2	1	1	1	60.4	1	0	110	41	0	91.68	4.17	245.7
596	1	2.21	0.72	0.195	12	1	8.3	0	1	1	0	0	0	2	0	2	1	1	1	52.9	2	0	92	36	0	96.6	4.4	284.2
597	1	2.48	1.02	0.318	19	2	1.1	2	1	0	1	0	0	2	0	2	1	1	1	96.8	1	0	126	18	0	88.36	5.95	353.6
598	1	2.55	0.87	0.236	22	1	4.5	0	0	0	0	0	0	2	0	1	1	1	1	66	0	0	100	31	0	70.79	3.53	433.5
599	1	2.53	1.23	0.722	29	2	6.9	1	0	0	0	0	0	2	0	2	1	1	1	67.9	0	0	135	15	0	140.39	3.37	438.6
602	1	1.65	0.63	0.487	17	5	29.4	1	0	0	0	0	0	2	0	2	2	2	1	97.4	0	0	150	42	0	80.44	4.58	405.3
603	1	1.88	1.05	0.114	22	2	9.1	0	0	0	0	0	0	2	0	2	2	2	1	60.5	0	1	114	40	0	90.73	4.22	214.9
604	1	1.98	0.74	0.364	29	3	0	0	0	0	0	0	0	2	0	2	1	1	1	95.6	0	0	114	21	0	88.8	3.9	330.3
606	1	1.92	0.76	0.024	22	0	0	0	0	0	0	0	0	2	0	2	0	0	0	82.5	0	0	100	20	0	96.61	5.81	340.3
607	1	3.14	0.85	0.224	38	3	0	3	2	2	0	0	2	3	0	2	2	2	1	56.3	0	0	130	29	0	105.13	5.77	212
608	1	2.95	1.05	0.499	10	0	0	0	1	0	1	0	0	2	0	2	1	1	1	68.5	2	0	137	22	0	146.2	3.84	328.6
609	1	2.92	0.96	0	17	0	0	0	1	0	1	0	0	1	0	2	1	1	1	57.5	1	1	119	36	0	92.66	2.66	306.7
610	1	2.06	0.85	0.048	15	0	0	0	0	0	0	0	0	4	0	2	1	1	1	50.9	0	0	105	32	0	108.7	4.01	171
611	1	1.69	0.81	0.295	40	2	5	3	0	0	0	0	3	4	0	2	2	2	1	56.9	0	0	139	14	0	106.23	7.2	422
613	1	2.06	0.82	0.056	8	1	12.5	0	0	0	0	0	0	2	0	2	2	2	0	64.2	1	0	125	44	0	82.86	3.39	191.8
614	1	2.86	1.02	0.135	10	0	0	0	0	0	0	0	0	3	0	2	1	1	1	62	1	1	104	29	0	98.27	4.15	268.5
615	1	2.89	0.9	0.792	13	7	53.8	0	0	0	0	0	0	2	0	2	3	3	1	83.6	0	0	122	26	0	81.26	5.88	348.5
616	0	2.66	0.71	0.063	17	0	0	0	0	0	0	0	0	2	0	2	1	1	1	96.5	0	0	120	33	0	83.19	5.3	187.3
618	1	2.7	0.94	0.433	17	0	0	0	0	0	0	0	0	2	0	2	1	1	1	62.8	0	0	120	28	0	97.89	4.43	312.9
619	1	1.87	0.67	0	20	1	5	1	0	0	0	0	1	2	0	2	2	2	1	54.7	0	1	100	27	0	116.63	7.15	161.6
620	1	3.76	0.69	0.044	29	0	0	0	0	0	0	0	1	1	0	2	2	2	1	61.5	2	1	112	27	0	100.85	6.68	220.1
622	1	2.83	1.41	1.615	13	5	38.5	2	3	0	0	3	0	2	0	2	2	2	1	121.2	0	0	145	52	0	58.05	7.51	625.4
623	1	1.79	1.05	0.321	19	0	0	0	0	0	0	0	0	2	6	2	1	1	1	53.9	0	0	144	21	0	128.11	4.49	265
624	1	1.93	0.77	2.52	11	3	27.3	1	2	1	1	0	0	2	5	2	2	2	1	60.7	0	0	120	20	0	93.01	5.43	304
625	1	2.18	0.81	0.256	13	0	0	0	0	0	0	0	0	2	0	1	1	1	1	63.2	0	0	120	18	0	100.91	3	190.5
630	1	4.48	1.2	0.84	11	3	27.3	0	0	0	0	0	0	2	0	2	1	1	0	93.6	0	0	158	47	0	95.33	447.9	5.4
631	1	2.71	0.78	0.401	13	0	0	0	1	0	1	0	0	3	5	2	2	2	0	59.2	0	0	127	28	0	115.71	4.05	234.9
632	0	2.45	0.92	0.12	23	2	8.7	0	0	0	0	0	0	2	6	2	1	1	0	91	0	0	111	32	0	81.75	5.9	303.7
633	1	0.9	1.24	0	15	0	0	0	0	0	0	0	0	2	6	2	0	1	1	68.5	0	0	130	24	0	139.56	5.8	353.8
634	1	1.94	0.71	0.55	8	5	62.5	1	0	0	0	0	0	2	2	2	3	3	1	79.3	1	0	129	30	0	79.34	6.6	381.5
635	1	2.46	0.78	1.373	15	1	6.7	3	4	0	4	0	0	2	6	2	2	2	1	68	0	0	121	23	0	91.74	3.98	307.5
638	1	1.74	1.1	0.28	12	2	16.7	0	0	0	0	0	0	2	0	2	1	1	1	68.9	0	0	116	50	0	81.94	3.25	210.7
640	1	1.36	0.63	0.05	10	0	0	0	0	0	0	0	0	2	0	2	1	1	1	74.3	0	0	120	42	0	62.05	4.7	177.9
641	1	2.25	0.85	0.644	12	1	8.3	0	0	0	0	0	0	2	0	1	0	0	0	75.3	0	0	161	46	0	88.75	6.78	234.6
642	1	1.41	1.26	1.406	11	1	9.1	2	0	0	0	0	0	2	3	2	2	2	1	61.8	2	0	130	21	0	132.87	6.68	402.6
643	0	2.23	0.85	0.05	16	3	18.8	0	0	0	0	0	0	2	0	2	1	1	1	68.8	0	0	117	46	0	85.71	5.21	249
645	1	1.78	0.72	0	19	4	21.1	0	3	0	3	0	0	2	0	2	2	2	1	105.1	2	0	125	26	0	70.71	4.43	318.5
646	1	2.91	0.79	0	16	1	6.3	0	0	0	0	0	0	2	6	2	2	2	1	75.6	1	0	128	53	0	84.93	5.45	473.5
647	1	3.02	1.01	0.6	10	4	40	1	1	0	1	0	1	3	6	5	3	3	1	105.4	0	0	130	26	0	90.46	5.09	356.6
653	1	2.74	1.38	2.904	7	1	14.2	0	0	0	0	0	0	3	6	2	3	3	1	62.7	2	0	120	55	0	79.37	5.87	261.8
654	1	2.58	0.95	0.427	13	1	7.7	2	1	0	1	0	0	2	0	1	2	2	1	72.5	0	0	150	20	0	105.86	5.74	216.3
655	1	2.55	0.82	0.15	18	0	0	1	0	0	0	0	0	2	6	2	1	1	1	54.1	1	0	120	27	0	111.37	4.51	277.4
657	1	2.75	0.94	0.092	25	0	0	0	0	0	0	0	0	2	0	2	1	1	1	48.4	1	0	130	16	0	209.56	4.16	391
658	1	3.14	1.15	0	14	1	7.1	2	0	0	0	0	2	2	0	2	2	2	1	104	2	0	120	21	0	115.41	6.22	503.9
659	1	1.38	0.77	0.031	6	0	0	0	0	0	0	0	0	2	0	1	0	0	0	50.4	0	0	120	31	0	90.44	4.71	224.3
661	1	3.97	0.93	0.321	15	0	0	0	0	0	0	0	0	2	0	1	1	1	1	62.9	1	1	110	20	0	129.06	4.83	368.4
662	1	2.48	0.33	0.31	8	2	25	1	0	0	0	0	0	3	0	2	3	3	1	71.1	1	0	110	24	0	92.11	3.41	273.2
663	1	3.18	1.04	0	4	0	0	0	0	0	0	0	0	2	0	2	0	1	1	83.5	2	1	115	22	0	83.92	4.07	292.2
665	1	2.26	0.87	0.38	25	16	64	1	0	0	0	0	1	3	0	5	3	3	1	118.3	1	0	115	42	0	40.71	8.11	316.2
666	1	2.04	1.28	2.253	8	0	0	0	0	0	0	0	0	2	0	1	0	0	0	105.9	0	0	160	27	0	68.25	10.47	440
667	1	1.31	0.93	0.05	16	0	0	0	0	0	0	0	0	2	0	2	1	1	1	82.8	0	0	120	27	0	110.79	5.5	267.9
668	1	2.96	1.21	0.945	10	0	0	0	0	0	0	0	0	3	0	2	2	2	1	129.1	2	1	120	35	0	57.82	5.56	274.3
669	0	3.01	1.08	3.526	8	0	0	3	2	1	0	1	0	2	6	3	2	3	1	65.2	0	0	135	39	0	89.89	5.34	333.1
670	1	1.38	1.03	0.464	9	3	33.3	0	0	0	0	0	0	2	6	1	2	2	1	111.4	0	0	120	57	0	59.57	8.67	448.1
671	1	1.93	0.88	0.11	25	2	8	0	2	0	2	0	0	2	0	2	2	2	1	59.4	0	0	125	22	0	166.15	4.06	335
672	1	2.41	0.74	1.05	11	1	9.1	2	0	0	0	0	1	3	0	2	2	2	1	80.3	1	0	125	39	0	65.75	4.3	213.2
673	1	2.08	0.76	0	12	3	0	0	0	0	0	0	0	2	0	1	1	1	1	30.4	1	0	120	48	0	174.02	3.77	192.6
675	1	4.45	1.04	0	32	1	3.1	1	0	0	0	0	0	2	0	2	2	2	1	50.6	0	1	120	21	0	140.15	3.13	265.1
677	1	1.99	0.81	0.599	29	0	0	1	6	0	6	0	0	3	5	5	2	2	1	59.2	0	1	140	21	0	109.28	5.39	315.6
682	1	2.49	0.61	0	8	1	0	0	0	0	0	0	1	2	0	1	1	1	1	52.1	0	0	118	38	0	81.87	3.19	239.4
683	1	1.18	0.83	0	15	0	0	0	0	0	0	0	0	3	0	1	1	1	1	70	1	0	100	13	0	100.42	5.6	300
684	1	2.35	0.7	0.538	20	2	0	0	0	0	0	0	0	2	0	1	2	2	1	75.5	0	0	120	23	0	77.77	4.06	274.5
685	1	2.49	0.75	0.594	6	0	0	2	0	0	0	0	2	2	0	2	1	1	1	75	0	0	179	40	0	96.19	5.4	322.9
686	1	4.55	0.79	1.13	13	4	0	1	0	0	0	0	1	0	0	1	2	2	1	73	0	0	120	38	0	92.03	2.94	317.4
687	1	1.69	1.26	1.793	17	1	0	0	0	0	0	0	0	2	0	2	1	1	1	68.9	0	0	120	38	0	86.67	4.7	240.4
688	1	1.65	1.14	0.05	18	0	0	0	0	0	0	0	0	2	0	2	1	1	1	81.1	1	0	120	16	0	95.91	4.85	360.4
689	1	2.54	0.81	0.192	26	1	3.8	3	0	0	0	0	0	2	3	2	1	1	0	83.1	2	0	130	24	0	116.75	3.89	337.8
690	1	1.59	0.95	0.234	30	0	0	2	2	0	2	0	0	2	0	2	1	1	0	39.6	0	0	130	29	0	128.95	2.72	238.2
691	1	1.19	2.02	7.934	18	1	5.6	0	0	0	0	0	0	3	0	1	0	0	0	125.5	0	0	120	19	0	84.2	9.07	561.2
692	1	1.54	0.67	0.213	22	4	18.2	2	0	0	0	0	0	2	0	1	2	2	0	91.5	0	0	126	27	0	68.43	4.79	300.2
693	0	1.92	0.93	0	38	3	7.9	2	1	0	0	1	0	3	5	2	1	1	0	50.3	0	0	120	28	0	115.23	3.56	218.9
694	0	2.05	0.82	0.05	7	1	14.3	0	0	0	0	0	0	2	0	2	2	2	1	96.8	0	0	100	30	0	57.03	4.48	404
695	1	2.81	1.02	0	28	0	0	0	0	0	0	0	0	2	0	1	1	1	0	54.4	0	0	116	24	0	122.62	3.79	243.8
697	1	0.84	0.33	0	25	4	16	0	0	0	0	0	1	3	0	2	1	1	0	65.2	0	0	100	46	0	80.64	6.46	243.6
699	1	1.65	1.69	8.822	23	0	0	0	0	0	0	0	0	2	0	1	0	0	0	89.4	1	0	120	21	0	97.42	8.7	359.2
701	0	1.92	0.85	1.956	22	0	0	0	0	0	0	0	0	2	0	2	0	0	0	73	0	0	120	13	0	109.13	4.65	594.5
702	0	1.48	1.23	0.111	21	1	4.8	0	0	0	0	0	0	2	0	2	1	1	1	40.92	2	0	110	33	0	153.09	6.53	250
703	1	1.34	0.97	2.019	40	0	0	0	0	0	0	0	0	2	5	1	0	0	0	64.3	0	0	122	22	0	183.96	4.31	326.6
705	1	1.63	1.11	0.592	13	5	38.5	1	0	0	0	0	0	3	0	2	2	2	1	83.6	2	0	116	32	0	79.01	3.71	329.6
706	1	4.99	1.09	0.208	26	6	0	0	0	0	0	0	0	2	0	1	2	2	1	81.5	0	0	115	55	0	67.6	4.22	308.8
707	1	2.39	0.76	0.421	21	1	4.8	0	0	0	0	0	0	3	0	1	0	0	0	75.6	2	1	104	19	0	97.45	6	293.1
708	1	2.01	0.81	0.201	21	4	19	3	0	0	0	0	2	2	0	2	2	2	1	71.1	4	0	135	21	0	90.99	6.28	247.3
709	1	1.88	1.2	0	15	5	33.3	0	0	0	0	0	0	2	0	2	2	2	1	114.4	0	1	112	33	0	51.34	7.05	246.7
710	0	2.24	1.47	0.05	26	2	7.7	0	0	0	0	0	0	3	0	1	0	1	1	73.5	0	0	120	37	0	125.83	4.71	422.9
712	1	1.48	2.76	0.113	29	2	6.9	2	0	0	0	0	2	2	0	1	3	1	0	58.9	2	0	125	21	0	92.94	4.1	282.7
713	0	1.64	1.19	0	4	0	0	0	0	0	0	0	0	2	0	1	0	0	0	59.6	0	0	120	39	0	106.3	5.76	237.5
714	1	3.93	0.95	0	23	2	8.7	1	0	0	0	0	0	2	0	2	2	1	0	47	2	1	120	33	0	164.23	4.96	235.3
715	1	2.97	1.28	3.988	10	0	0	0	0	0	0	0	0	2	0	1	0	0	0	77.4	0	0	132	20	0	128.72	6.35	382.6
716	1	3.57	1.03	0	19	6	31.6	0	3	0	3	0	0	3	3	2	2	2	0	56.2	1	0	120	33	0	95.55	6.27	309.2
717	1	3.15	0.96	0.498	20	8	40	2	1	0	0	1	0	3	0	5	2	3	1	121.5	0	0	166	27	0	59.49	5.84	392.7
718	1	3.15	1.43	4.5	26	0	0	0	0	0	0	0	0	2	0	1	0	0	0	58.9	1	0	127	24	0	102.95	3.79	268
719	1	1.67	0.92	0.087	13	0	0	0	0	0	0	0	0	3	3	5	2	1	0	49.5	0	1	132	27	0	124.11	3.07	277.3
720	0	1.31	1.2	0.204	11	1	0	0	0	0	0	0	0	2	0	2	0	0	0	55.3	1	0	121	16	0	103.15	4.57	363.3
721	1	5.87	1.12	0.75	25	1	4	1	1	1	0	0	0	3	0	3	2	2	0	63.7	0	0	130	22	0	125.32	6.18	280.9
723	1	3.06	1.05	0	13	2	15.4	0	0	0	0	0	0	2	0	1	1	1	0	66.8	1	1	93	27	0	92.85	4.3	151.8
724	1	1.89	1.27	3.42	17	0	0	0	0	0	0	0	0	3	0	1	0	1	1	105.8	0	0	121	22	0	92.6	7.75	447.3
725	1	2.26	1.09	0.082	11	0	0	2	0	0	0	0	2	3	0	5	2	2	0	102	2	0	139	23	0	70.54	7.9	246.4
726	1	4.55	2.28	0	7	2	28.6	1	0	0	0	0	0	3	3	5	2	2	1	64.4	1	0	117	43	0	105.51	4.37	242
728	1	3.01	1.15	0	19	8	42.1	1	0	0	0	0	1	2	0	1	2	1	1	47.6	0	0	108	32	0	132.84	6.7	277.2
729	0	2.98	1.05	0.235	10	3	30	0	0	0	0	0	0	2	0	1	2	2	0	82.5	0	0	139	50	0	106	7.56	337.8
730	1	1.81	0.91	0.708	23	1	0	3	2	0	2	0	0	2	0	1	2	2	1	56.2	1	1	120	23	0	87.06	2.96	298.1
732	1	3.17	1.03	0.6	11	2	18.2	0	0	0	0	0	0	3	3	2	1	1	0	67.1	0	0	120	40	0	76.35	5.67	280
733	1	2.1	0.93	0.6	16	6	37.5	2	0	0	0	0	0	2	0	2	2	2	1	116.9	2	0	125	28	0	55.39	4.23	368.3
735	1	3.46	1.13	0.5	13	2	0	0	0	0	0	0	0	3	0	5	1	1	0	66.9	1	0	121	19	0	112.35	4.07	392.6
736	1	2	1.3	0.523	22	2	9.1	3	2	0	2	0	3	3	0	5	2	1	0	53.6	1	0	102	16	0	108.84	2.55	214.7
738	1	2.8	1.93	0	18	1	5.6	0	0	0	0	0	0	2	0	2	0	1	0	77.9	0	0	120	20	0	147.79	7.28	502.4
739	1	3.64	0.95	0.489	22	4	18.2	3	0	0	0	0	0	3	0	2	2	2	0	109.2	0	0	125	23	0	63.26	3.9	366.9
740	1	2.24	1.26	0	11	2	18.2	3	0	0	0	0	0	2	0	2	2	2	0	99.1	0	0	156	39	0	57.54	5.09	451
741	1	2.24	0.82	0.45	6	1	0	2	0	0	0	0	0	2	0	2	0	1	0	55.3	2	0	130	33	0	97.1	4.15	238.7
742	1	1.76	1.05	0.078	33	0	0	0	0	0	0	0	0	2	0	2	3	3	0	67.1	0	1	143	19	0	115.01	5	263.8
743	1	2.14	1.74	0	29	1	3.4	0	0	0	0	0	0	2	0	1	0	0	0	62.5	0	1	110	20	0	151.14	4.2	304
744	1	2.25	0.88	0	20	4	20	1	0	0	0	0	0	2	0	2	2	2	0	110.1	1	0	122	18	0	74.96	4.93	492.8
745	1	1.79	0.83	0	17	1	5.9	1	0	0	0	0	0	2	0	2	1	1	0	70.7	0	0	119	20	0	74.53	4.9	303.7
747	1	1.79	1.18	0.159	12	4	33.3	0	0	0	0	0	0	1	3	3	1	1	0	107.1	0	0	144	58	0	55.56	7.45	345.7
748	1	4.02	1.03	0.363	13	9	69.2	1	0	0	0	0	0	3	3	2	3	3	0	104.1	0	0	160	26	0	59.54	5.31	309.5
749	1	2.29	1.03	1.014	12	2	16.7	2	0	0	0	0	0	2	0	2	2	2	0	83	0	0	124	23	0	99.48	5.83	548.2
750	1	2.13	1.24	0.526	14	3	21.4	2	3	0	0	3	0	2	3	2	2	2	0	76.7	0	0	146	53	0	61.67	5.41	454.3
751	1	1.6	1.15	0.47	17	1	5.9	0	0	0	0	0	0	2	0	1	1	1	0	110.6	1	0	129	18	0	70.55	5.69	467.1
753	0	1.45	0.99	0	17	3	17.6	0	0	0	0	0	2	2	3	2	2	2	0	68.1	0	0	97	37	0	102.78	3.51	347.9
754	1	4.28	0.98	0	19	1	5.3	0	0	0	0	0	0	3	3	5	1	1	0	57.1	0	1	110	20	0	115.35	4.55	264.1
756	0	2.34	0.79	0.156	26	5	19.2	3	0	0	0	0	1	4	0	1	1	1	1	49.8	1	1	91	31	0	130.44	7.65	152.6
757	1	1.45	0.78	0.222	8	0	0	3	0	0	0	0	0	3	0	1	1	1	1	51.7	0	0	98	22	0	100.22	3.62	219.2
758	1	3.17	0.88	0.442	30	6	20	4	1	0	0	1	0	3	0	1	2	2	1	58.7	0	0	98	24	0	92.97	4.27	291.9
759	0	2.7	1.06	0	21	1	4.8	1	0	0	0	0	0	2	4	1	1	1	1	50.5	0	0	120	18	0	108.61	3.01	217
761	0	1.29	0.83	0.129	15	0	0	0	0	0	0	0	1	2	0	1	1	1	0	57.1	0	0	123	37	0	91.47	3.73	169.5
762	1	2.17	1.12	0	20	0	0	2	0	0	0	0	0	3	0	1	0	0	0	79.2	0	0	114	28	0	112.19	4.25	422
763	0	1.7	0.95	0.195	7	0	0	0	0	0	0	0	1	2	0	1	1	1	0	80.7	2	0	133	37	0	106.75	6.64	334.7
764	1	1.55	0.75	2.335	4	0	0	3	0	0	0	0	0	2	0	5	3	3	1	73.6	0	0	151	25	0	73.51	3.5	271.5
765	0	1.41	0.88	0.291	14	0	0	0	0	0	0	0	2	3	0	1	1	1	0	82.5	0	0	118	30	0	109.88	5.16	376.3
766	1	1.47	0.78	1.208	16	2	12.5	2	0	0	0	0	0	3	0	1	1	1	1	66.3	0	0	150	31	0	94.54	6.07	3.15
767	1	3.55	0.82	0.568	13	4	30.8	3	0	0	0	0	0	2	0	3	2	2	1	68.4	0	0	125	24	0	85.11	6.84	264.8
768	1	3.65	1.44	0.473	12	0	0	0	0	0	0	0	0	2	0	0	1	1	0	70.8	0	0	120	33	0	83.74	4.46	288.8
769	1	4.31	1.48	0.189	22	1	0	3	0	0	0	0	0	2	0	2	1	1	1	25.2	1	0	130	31	0	208.02	5.67	294.3
770	1	1.5	0.68	0.123	30	0	0	0	0	0	0	0	0	2	0	2	1	1	0	76.3	0	0	120	42	0	94.79	5.31	320.6
771	1	1.86	0.92	0.477	8	0	0	1	0	0	0	0	0	2	0	2	1	1	1	69.7	2	0	110	17	0	95.94	4.7	369.3
772	1	2.62	1.05	1.23	20	0	0	1	1	0	0	1	0	2	3	2	1	1	1	71.1	1	0	147	20	0	124.56	4.99	296.3
773	0	0.99	0.87	0.7	15	4	0	2	0	0	0	0	0	2	0	2	1	1	1	79.5	1	0	121	19	0	101.09	4.4	390
774	1	4	0.97	3	18	0	0	0	1	1	0	0	0	3	0	2	1	1	1	106.7	1	1	132	25	0	119.31	6.05	375.7
776	0	2.09	1	0.05	27	1	0	0	0	0	0	0	0	2	0	2	0	0	0	71.5	2	0	110	28	0	90.07	5.67	290.6
777	1	1.82	0.97	0.05	26	3	0	0	0	0	0	0	0	2	0	2	1	1	1	74.6	2	0	124	40	0	128.61	4.16	340
779	1	1.94	0.97	10.56	16	1	0	0	0	0	0	0	0	1	0	2	1	1	1	86.2	1	0	145	20	0	118.15	3.86	292.9
781	1	1.36	0.8	0.05	47	0	0	0	0	0	0	0	0	2	0	2	1	1	1	96.2	1	0	128	32	0	99.42	3.74	256
784	1	2.94	0.74	0.311	18	5	0	3	0	0	0	0	0	2	0	2	2	2	1	95.1	0	0	123	34	0	115.16	4.23	504.6
785	1	3.45	1.13	0.622	15	3	0	2	0	0	0	0	0	2	0	2	1	1	1	100	0	0	145	34	0	95.18	6.26	371.6
786	1	4.07	1.2	0.05	24	0	0	0	0	0	0	0	0	4	0	2	1	1	1	80.5	0	0	166	45	0	96.24	6.21	323.7
787	1	3.13	1.07	0.05	26	0	0	0	0	0	0	0	0	2	0	2	1	1	1	70.8	0	0	120	28	0	155.66	6.8	303.1
788	1	2.87	0.65	0.05	15	2	0	1	0	0	0	0	0	2	0	2	1	1	1	76	4	1	110	25	0	87.01	3.5	270
789	1	2.8	1.01	0.6	19	10	0	0	0	0	0	0	0	3	0	2	2	2	1	76.4	0	0	108	29	0	53.16	7.7	478.2
790	1	2.41	0.84	4.205	24	1	0	0	0	0	0	0	0	2	0	2	1	1	1	99.1	0	0	106	30	0	63.83	3.69	247.1
791	1	2.89	0.86	0.655	22	4	0	3	1	0	0	1	0	3	3	2	2	2	1	61.3	2	0	125	40	0	110.86	3.25	355.3
793	1	2.78	0.98	0	19	0	0	0	0	0	0	0	0	1	0	2	1	1	1	65.3	1	0	113	16	0	130.8	5.88	448.2
794	0	0.73	0.58	0	7	0	0	0	0	0	0	0	0	2	6	2	1	1	0	67.1	0	0	138	46	0	71.77	3.58	228.5
795	1	4.4	0.87	0.561	23	3	0	7	2	0	2	0	0	3	0	5	2	2	1	73.3	0	0	133	20	0	69.32	4.68	309.5
796	1	1.56	0.75	0.6	7	1	0	0	0	0	0	0	0	2	6	2	1	1	1	85.7	0	0	167	45	0	69.54	4.45	261.7
797	1	1.1	0.67	0.05	16	0	0	0	0	0	0	0	0	2	0	2	0	0	0	77.5	0	0	128	31	0	76.46	5.31	272.2
799	1	0.84	0.87	0.05	9	1	0	1	0	0	0	0	0	2	0	2	1	1	1	50.1	2	1	112	14	0	118.32	3.18	216.4
800	1	1.14	0.77	8.105	12	0	0	0	0	0	0	0	0	6	6	5	1	1	1	109.3	0	0	136	57	0	68.65	12.65	531.7
801	1	3.54	0.99	0.189	18	0	0	0	0	0	0	0	0	2	0	2	1	1	1	101.7	1	0	130	35	0	93.97	3.02	461.1
803	1	3.31	0.92	0.455	26	6	0	1	0	0	0	0	0	3	0	2	2	2	1	67.9	0	0	123	40	0	92.39	3.94	421.3
806	1	1.63	0.85	0.172	26	3	0	0	1	1	0	0	0	3	0	2	2	2	1	110.1	0	0	114	38	0	78.63	5.87	431.5
807	0	4.89	0.94	0.447	20	1	0	1	1	1	0	0	0	2	0	2	1	1	1	78.7	0	0	117	34	0	102.71	6.17	351.7
808	1	1.46	1.08	0	24	0	0	0	0	0	0	0	0	2	0	2	1	1	1	46.2	0	0	152	27	0	186.52	4.92	318.4
811	1	2.91	1.36	1.375	14	0	0	0	2	2	0	0	0	2	0	1	0	0	0	96.9	0	1	125	48	0	82.91	6.16	320
813	1	2.44	1.22	8.846	37	7	0	9	0	0	0	0	0	3	3	5	2	2	0	118.1	0	0	140	39	0	84.15	7.07	390.8
814	0	2.18	0.85	1.5	15	4	0	4	0	0	0	0	3	3	0	2	1	1	0	81	0	0	139	49	0	59.9	7.43	445.5
815	1	1.67	0.91	1.569	27	2	0	1	0	0	0	0	0	2	6	1	2	2	0	50.6	0	0	161	59	0	85.35	6.43	190.8
817	0	1.65	0.9	0	21	1	0	0	0	0	0	0	0	2	0	1	0	0	0	67.9	0	0	106	19	0	91.29	4.9	295.5
818	1	3.86	0.58	0	15	0	0	0	0	0	0	0	0	3	0	1	0	0	0	66.7	0	0	97	45	0	83.39	244.8	5.58
819	1	5.53	0.85	1.939	18	1	0	2	0	0	0	0	0	2	0	2	2	2	0	73.3	0	0	127	62	0	60.08	292.3	6.31
820	0	0.43	0.65	0	12	2	0	0	0	0	0	0	0	2	0	1	1	1	0	77.6	0	0	128	29	0	83.75	5.25	277.6
824	1	1.2	0.94	7.225	14	1	0	0	4	4	0	0	0	3	3	2	0	1	0	102.7	0	1	137	14	0	99.6	8.95	464.5
825	1	2.24	0.94	1.598	22	0	0	0	0	0	0	0	0	2	0	1	0	0	0	60.6	0	0	139	18	0	123.81	4.34	350.4
827	1	3.79	0.65	1.093	10	3	30	1	1	1	0	0	0	2	0	2	1	1	0	67.2	2	0	120	25	0	121.66	4.89	345.3
828	1	1.47	1.08	2.231	11	5	0	2	0	0	0	0	0	2	0	2	3	3	1	118.1	0	0	110	25	0	62.1	11.26	398.3
830	1	1.64	1.25	0	26	4	0	0	0	0	0	0	0	2	0	1	1	1	0	91.2	0	0	133	19	0	159.93	10.6	443.5
831	1	2.87	0.83	0	52	0	0	0	0	0	0	0	0	2	0	1	0	0	0	45.4	2	0	85	20	0	125.74	1.97	256.8
832	1	4.17	1.73	0.427	24	2	0	1	0	0	0	0	0	2	0	2	2	2	1	77.7	0	0	120	45	0	66.47	4.63	439.8
834	1	3.26	1.11	0.598	29	10	0	1	1	0	0	1	0	2	0	2	1	1	0	102.8	0	0	106	47	0	65.65	5.57	346.8
835	1	3.08	1.03	0.05	21	2	0	0	0	0	0	0	0	2	0	2	1	1	1	55.4	0	0	119	42	0	81.38	3.58	232.9
836	1	3.02	1.28	0.599	27	1	0	2	0	0	0	0	0	3	5	2	1	1	0	54.6	0	0	130	44	0	114.89	6.05	380.4
837	0	1.7	1.12	0.603	13	0	0	0	0	0	0	0	0	2	5	1	0	0	0	91	1	0	125	22	0	81.34	4	408.5
838	1	2.43	1	0.287	13	0	0	0	0	0	0	0	0	3	0	1	2	2	1	78.3	0	0	122	35	0	98.97	5.17	339.2
840	1	4.35	1.44	0.284	34	0	0	0	2	2	0	0	0	2	0	2	1	1	1	80.4	0	0	120	25	0	142.51	3.42	369.4
842	0	1.36	0.81	5.393	22	1	0	0	0	0	0	0	0	2	0	2	1	1	1	47.1	1	0	130	38	0	126.79	3.61	161.2
843	0	2.97	1.08	0.05	22	0	0	0	0	0	0	0	0	1	6	2	1	1	1	85.3	0	0	135	51	0	73.15	5.14	385.3
844	1	1.39	1.05	0	21	5	0	1	0	0	0	0	0	2	0	2	2	2	1	84.8	0	0	110	47	0	65.36	6.71	404
845	0	2.58	0.69	0.05	10	1	10	0	0	0	0	0	0	2	0	2	1	1	1	75.4	1	0	139	48	0	57.41	4.74	190.5
847	1	2.2	1.03	0.339	35	3	8.6	4	3	1	2	0	0	5	3	2	1	1	1	71.3	2	0	105	20	0	74.78	2.49	278.4
848	1	2.4	1.24	0.05	20	1	0	0	0	0	0	0	0	2	3	2	1	1	1	48.8	0	0	116	29	0	112.96	3.83	181.4
850	1	2.04	0.98	1.936	17	4	0	4	2	0	0	2	0	3	3	5	3	3	1	87.2	1	1	120	30	0	74.52	4.34	234.8
851	1	2.61	0.8	0.572	12	0	0	2	0	0	0	0	0	2	0	2	1	1	1	84.3	0	0	130	38	0	120.55	5.43	254.8
852	0	2.65	1.99	0.05	5	0	0	0	0	0	0	0	0	2	5	2	1	1	1	53.3	2	0	105	25	0	109.4	3.84	271.1
853	1	2.18	0.84	0.05	22	4	0	2	0	0	0	0	0	2	0	2	1	1	1	71	1	0	105	31	0	77.04	4.64	304.6
854	1	2.08	0.41	0.252	10	3	0	0	0	0	0	0	0	2	3	2	1	1	1	76.9	0	0	120	42	0	76.61	3.51	206
855	0	1.05	1.08	0.702	6	0	0	0	0	0	0	0	0	2	0	2	0	1	0	56.6	1	0	120	16	0	158.99	2.79	347
856	0	0.76	0.76	0	25	5	0	0	0	0	0	0	0	2	6	2	1	1	1	69	2	0	100	32	0	83.46	4.03	278.8
857	1	2.11	0.66	0.584	12	4	33.3	3	0	0	0	0	0	6	6	5	2	2	1	101.6	2	0	100	26	0	56.31	4.73	334.8
858	1	2.04	0.87	0.174	29	0	0	0	0	0	0	0	0	2	6	2	1	1	1	77.2	0	0	120	21	0	125.13	7.52	380.2
859	1	1.8	0.81	0.05	24	0	0	0	0	0	0	0	0	1	0	2	1	1	0	81.1	0	0	120	18	0	86.96	3.62	344.3
860	1	2.82	1.03	0	16	3	18.75	3	0	0	0	0	1	3	0	5	1	1	1	55.3	0	0	100	35	0	93.3	4.19	342.2
861	1	0.58	1.15	2.685	17	0	0	0	0	0	0	0	0	1	0	2	0	0	0	55.2	0	0	110	15	0	99.44	6.01	301.7
862	0	0.67	0.53	0	6	0	0	0	0	0	0	0	0	2	0	2	1	1	0	55.4	0	0	128	52	0	95.49	3.32	125.9
863	0	1.91	0.44	0	26	1	3.8	0	3	0	2	1	0	3	6	5	1	1	1	72.1	1	1	100	26	0	77.69	6.57	301
864	0	1.96	0.51	0	25	0	0	0	0	0	0	0	0	2	0	2	1	1	1	4.7	1	1	110	40	0	1267.95	2.32	237
866	0	1.66	0.95	0	23	0	0	0	0	0	0	0	0	2	0	1	1	0	0	41.9	1	0	110	26	0	130.85	2.88	259.3
867	1	2.99	0.57	0	23	1	0	0	0	0	0	0	0	3	0	5	2	2	1	67.1	1	0	100	26	0	87.92	3.2	208.3
868	1	1.99	1.24	0.5	15	0	0	0	0	0	0	0	0	2	0	2	1	1	1	68.1	0	0	125	32	0	144.35	5.49	421.6
869	1	2.5	0.71	0.169	18	0	0	2	1	0	1	0	1	3	2	5	1	1	1	65.2	2	0	110	19	0	141.53	3.36	349
870	1	2.3	1.04	0.945	15	1	0	2	0	0	0	0	2	3	3	2	2	2	1	116.1	2	0	130	25	0	91.38	3.56	572
871	1	2.89	0.82	0.11	23	4	17	3	0	0	0	0	3	3	3	5	2	2	1	72.4	0	0	110	25	0	97.98	3.73	270
872	0	1.31	0.67	0.131	15	0	0	0	0	0	0	0	0	2	0	1	1	1	1	41.8	0	0	120	41	0	141.14	4.16	206.3
873	1	1.02	0.52	0	7	1	14	0	0	0	0	0	0	2	0	2	1	1	1	49.4	1	0	90	35	0	94.44	3.31	255.3
874	1	3.97	1.11	1.71	6	1	0	4	1	1	0	0	4	0	0	2	2	2	1	90.8	1	0	135	33	0	71.46	6.69	429.1
875	0	2.41	0.55	0	21	1	0	0	0	0	0	0	0	3	0	2	1	1	1	54.5	1	1	105	26	0	98.41	3.66	340.8
876	0	1.61	0.51	0.276	10	2	20	1	0	0	0	0	0	2	0	2	2	2	1	105.8	2	0	120	33	0	47.58	8.03	242.1
877	1	1.9	0.61	0.607	30	0	0	8	0	0	0	0	7	2	0	5	2	2	1	109.1	1	0	118	37	0	87.09	5.51	444.2
878	1	1.1	0.6	0.79	13	2	15	2	0	0	0	0	0	3	2	5	1	1	1	63.5	0	0	120	32	0	101.36	5.82	167.2
879	1	1.44	0.98	0	19	6	32	1	0	0	0	0	0	2	0	2	2	2	1	63	1	0	90	28	0	85.5	4.67	406.2
880	1	1.29	0.9	0	33	3	0	0	0	0	0	0	0	2	0	1	1	1	1	83.5	4	1	130	18	0	97.04	2.69	392.8
882	1	0.95	0.93	0	17	2	0	2	0	0	0	0	0	3	0	5	2	2	1	88.5	1	0	120	32	0	67.62	3.93	288
883	0	1.21	1.05	0	21	1	0	0	0	0	0	0	0	2	0	1	1	1	1	84	1	0	130	43	0	64.59	5.48	302.3
884	0	1.47	1.04	0	22	4	0	3	0	0	0	0	3	2	0	2	2	2	1	91.3	0	1	80	45	0	77.43	5.23	399.2
885	1	1.51	0.57	1.959	17	2	0	4	0	0	0	0	4	3	3	5	2	2	1	6.12	0	0	130	17	0	1137.15	68.3	293.3
886	0	2.92	0.83	0.991	23	2	0	2	0	0	0	0	2	2	0	2	2	2	1	67.6	1	0	100	36	0	80.42	4.79	255
887	1	1.71	1.1	0.938	24	7	0	4	0	0	0	0	0	2	0	2	2	2	1	87	0	0	120	19	0	101.79	7.52	401
888	1	1.63	1.02	0	7	1	0	0	0	0	0	0	0	3	0	2	2	2	1	75.7	0	0	120	40	0	81.49	4.62	347.3
889	0	1.44	0.53	0	25	3	0	0	0	0	0	0	0	2	0	2	1	1	1	70.2	1	0	110	40	0	74.47	3.81	239.1
890	1	1.72	1.14	0	16	4	0	3	1	0	0	1	1	2	0	2	1	1	1	92.9	0	0	100	39	0	55.7	3.89	350.3
891	1	2.44	0.99	0.469	18	3	0	2	0	0	0	0	0	2	0	1	2	2	1	65.2	0	0	120	32	0	102.18	2.13	344.3
892	1	2.49	0.65	0.11	13	3	0	2	0	0	0	0	0	3	3	5	2	2	1	108.4	1	0	115	43	0	85.85	7.13	612.6
893	0	3.44	0.84	0	23	6	0	3	0	0	0	0	3	3	0	5	2	2	1	105.1	0	0	120	60	0	41.78	6.07	281.3
894	1	3.9	0.9	0.6	20	2	0	0	0	0	0	0	0	2	0	2	1	1	1	57.4	2	1	130	38	0	103.11	3.75	355.4
895	1	1.05	1.13	1.5	29	3	0	1	1	1	0	0	1	3	6	5	1	1	1	61.8	0	0	110	39	0	126.44	8.36	340
896	1	6.27	0.72	0	16	0	0	0	0	0	0	0	0	2	0	2	1	0	0	54.7	2	0	110	33	0	110.44	6.14	234.7
897	1	0.97	0.16	0.05	8	4	50	0	0	0	0	0	0	2	0	2	2	2	1	108.4	0	1	125	65	0	57.02	5.22	501.3
898	1	1.07	0.61	3.6	22	9	0	5	0	0	0	0	0	5	3	5	2	2	1	112.9	0	0	120	51	0	46.98	7	398.6
900	0	1.52	0.73	0.45	27	6	0	2	0	0	0	0	2	3	6	5	1	1	1	56.7	0	0	100	19	0	141.74	3.94	351
901	0	2.8	0.78	0	22	2	0	0	0	0	0	0	0	2	0	2	1	1	1	73.9	0	0	135	50	0	70.67	6	283.3
902	1	2.71	0.75	0.598	16	3	0	2	0	0	0	0	0	2	0	2	1	1	1	85.6	1	1	130	36	0	103.86	3.93	422.5
903	1	2.19	0.67	0	54	1	0	0	0	0	0	0	0	2	0	1	1	1	1	60.4	2	1	110	26	0	106.56	2.99	255.6
904	0	1.98	1.16	0	19	5	0	2	0	0	0	0	0	2	0	2	1	2	1	73.2	0	0	120	45	0	115.33	3.29	247.9
905	1	3.37	1.08	0	17	1	0	0	0	0	0	0	0	2	0	2	1	1	1	60.9	2	1	120	22	0	98.25	4.8	323.2
906	1	2.9	0.96	0	21	0	0	0	0	0	0	0	0	2	0	2	1	1	1	52.7	1	1	100	22	0	122.9	4.27	271.7
907	1	1.75	0.8	1.885	16	2	0	2	0	0	0	0	2	3	0	2	2	2	1	95.2	1	0	120	31	0	128.16	4.93	370.3
908	0	1.86	0.63	0	23	3	0	1	0	0	0	0	1	3	0	2	2	2	1	94.3	0	0	125	33	0	55.76	4.43	348.4
909	1	2.95	1.21	0	12	1	0	0	0	0	0	0	0	2	0	2	1	1	1	73.3	0	0	110	26	0	112.86	4.2	315.6
910	1	2.74	1	0.335	18	1	0	1	0	0	0	0	1	3	0	5	1	1	1	74.2	0	1	125	16	0	131.55	3.31	403.1
911	0	1.4	0.94	0.05	11	1	0	0	0	0	0	0	0	2	0	2	0	0	0	45.8	1	0	95	23	0	124.19	3.88	265.7
912	1	3.66	1.05	0.682	29	4	0	3	0	0	0	0	0	3	0	5	2	2	1	82.2	1	0	124	23	0	105.04	4.09	374.9
914	0	2.69	0.98	0.563	21	0	0	3	4	4	0	0	3	3	0	5	1	1	1	66.9	0	0	110	26	0	73.04	5.18	255.6
915	1	3.26	1.36	0.624	18	0	0	3	0	0	0	0	3	3	0	1	2	2	1	83.8	1	0	148	32	0	94.32	2.84	362.4
916	1	3.73	1.14	0.869	22	7	0	1	0	0	0	0	0	3	0	2	1	1	1	3.35	0	0	130	25	0	1812.46	87.1	314.4
918	0	3.25	1.02	1.359	4	0	0	0	0	0	0	0	0	2	0	1	0	0	0	135.7	0	0	129	39	1	51.36	7.12	507.3
919	1	4.16	1.23	0.553	16	4	25	5	1	0	1	0	0	3	0	1	2	2	1	150.3	0	0	112	28	1	57.74	4.8	535.6
921	1	1.74	0.9	0.676	4	1	25	0	0	0	0	0	0	3	0	1	2	2	1	159	0	0	118	25	1	24.95	10	409
922	0	2.29	0.15	0.262	17	0	0	0	0	0	0	0	0	5	6	5	1	1	1	266.7	2	0	115	15	1	22.54	16	669.8
923	1	2.31	1.04	6.943	18	10	55.6	5	4	1	1	2	5	2	6	5	3	3	1	241.3	1	1	140	17	1	31.98	15.05	450.6
924	1	2.45	0.19	0.319	10	5	50	1	0	0	0	0	1	3	0	1	0	0	1	62.5	2	0	130	29	1	131.83	4.96	495.3
925	1	2.44	0.89	6.321	21	6	28.6	4	7	0	3	4	0	5	0	5	2	2	1	142.7	0	0	167	39	1	48.75	13.4	327.9
927	0	3.01	1.01	4.385	9	8	55.9	1	8	0	4	4	0	0	0	5	3	3	1	394.8	0	0	157	65	1	10.13	27.3	622.5
929	1	2.59	1.16	0.538	19	1	5.3	2	0	0	0	0	2	3	0	1	1	1	1	102.4	0	0	137	44	1	80.72	5.98	357.7
930	1	2.03	0.42	1.373	19	3	15.8	6	0	0	0	0	0	4	6	5	2	2	1	229.3	0	0	140	70	1	23.66	15.93	535.3
931	0	2.37	1.31	15.25	14	8	57.1	0	11	0	11	0	0	3	6	5	3	3	1	385.5	0	0	180	31	1	19.51	10.26	273.5
932	0	2.04	1.33	0.521	15	7	46.7	2	0	0	0	0	0	3	6	5	2	2	1	169.5	0	0	169	28	1	78.02	5.68	331.3
933	0	1.54	1	0.376	9	5	55.5	0	0	0	0	0	0	2	0	1	3	3	1	117.7	0	0	108	32	1	51.8	4.44	225.8
934	0	1.56	0.98	7.595	16	5	31.3	3	0	0	0	0	0	3	6	3	3	3	1	174.4	0	0	130	51	1	40.02	4.44	26.33
935	0	2.47	1.12	0.171	9	1	11.1	0	0	0	0	0	0	2	0	1	1	1	1	111.1	4	0	149	56	1	62.31	6.03	390.7
936	0	2.23	1.28	2.203	21	2	9.52	5	2	0	2	0	0	3	6	5	2	2	1	230.3	0	0	134	53	1	21.33	22.21	660.3
937	0	4.51	1.13	2.171	6	1	16.7	2	0	0	0	0	2	3	0	1	1	1	1	127.4	0	0	113	65	1	44.89	5.66	389.8
938	0	3.71	1.15	5.285	13	8	61.5	4	0	0	0	0	0	3	6	5	3	3	1	201.3	0	0	167	48	1	34.88	8.53	500.3
940	0	3.9	0.95	2.939	17	17	100	0	17	0	0	17	0	0	0	0	4	4	1	571.2	0	0	173	34	1	10.09	18.2	277
941	0	3.85	1.27	1.035	9	2	22.2	4	0	0	0	0	0	5	0	5	2	2	1	173.3	0	0	123	37	1	47.52	10	594.4
942	0	1.69	0.74	1.376	10	8	80	2	8	0	0	8	0	0	0	5	3	3	1	404.6	0	0	156	76	1	11.67	25.98	452.6
943	1	3.5	1.26	3.9	3	0	0	0	0	0	0	0	0	2	0	1	0	0	0	131.6	0	0	166	60	1	49.35	9.63	605.8
944	1	6.58	1.18	0.749	7	3	42.9	1	0	0	0	0	0	3	0	1	2	2	1	116.1	0	0	141	30	1	54.48	5.13	41.1
946	0	1.37	1.02	3	19	3	15.8	4	10	3	7	0	0	3	6	5	2	2	1	135.8	0	0	142	40	1	48.91	12.02	426.5
947	0	2.83	1.01	2.883	8	8	0	0	0	0	0	0	0	0	0	0	4	4	1	302.8	0	0	160	54	1	16.93	12.35	473.8
948	0	2.12	0.73	0.422	5	2	40	0	0	0	0	0	0	2	6	3	3	3	1	187.9	0	0	96	38	1	30.05	8.19	326.4
949	0	2.01	1.05	0.398	10	0	0	3	0	0	0	0	0	2	6	3	2	2	1	120.3	0	0	123	45	1	36.33	5.8	277.2
950	0	2.46	1.17	3.38	11	1	9.1	0	0	0	0	0	0	2	0	1	1	1	1	164.2	0	0	197	58	1	47.91	15.3	415.5
951	0	3.27	1.48	4.731	8	2	25	4	0	0	0	0	0	4	5	5	2	2	1	199.9	0	0	135	51	1	43.26	11.1	599.5
952	0	3.13	1.15	1.727	11	0	0	2	0	0	0	0	0	4	0	3	2	2	1	167.9	0	0	145	44	1	61.89	4.9	602
953	0	1.93	1.12	2.577	13	9	69.2	2	0	0	0	0	0	2	0	1	2	2	1	195.5	0	0	164	57	1	37.6	6.39	357.4
954	0	2.14	0.92	0.435	12	1	8.3	4	0	0	0	0	0	2	6	3	2	2	1	116	0	0	127	30	1	67.65	6.21	470.4
955	1	1.19	0.96	10.203	13	11	84.6	2	0	0	0	0	0	3	6	5	4	4	1	328.3	0	0	160	26	1	0.43	16.6	598.1
956	0	0.9	0.39	5.809	11	1	9.1	4	4	0	4	0	0	6	6	5	2	2	1	263.5	0	0	164	26	1	42.04	25.64	814.2
957	0	1.8	0.7	0.966	6	1	16.7	3	0	0	0	0	0	2	6	5	2	2	1	217.3	0	0	126	36	1	25.52	12.38	465.6
958	0	5.08	1.26	2.93	13	1	7.7	0	8	5	3	0	0	3	6	5	1	1	1	411.9	0	0	132	59	1	13.98	21.6	536.4
960	0	4.36	1.6	1.238	9	3	33.3	0	0	0	0	0	0	2	0	1	1	1	1	136.3	0	0	144	52	1	51.62	6.53	437
961	0	1.97	0.28	3.753	7	0	0	2	1	0	1	0	0	6	6	5	0	0	0	181.9	0	0	127	37	1	25.46	9.33	640.4
962	0	2.49	1.05	0.749	7	0	0	1	0	0	0	0	0	3	6	1	2	2	1	179.1	0	0	126	23	1	32.78	6.3	457.1
963	0	2.42	0.84	3.019	20	1	5	0	4	4	0	0	0	5	6	5	0	0	1	194.8	0	0	178	55	1	26.92	31.7	652.1
964	0	3.56	0.83	3.832	10	2	20	0	0	0	0	0	0	3	6	5	1	1	1	165.4	0	0	129	63	1	35.5	7.06	331.7
965	0	1.14	1.04	4.856	8	6	75	2	5	2	3	0	0	0	0	0	3	3	1	206.3	0	0	168	34	1	30.62	7.1	549.7
966	0	3.33	1.34	0.443	5	0	0	0	0	0	0	0	0	2	0	1	3	3	1	164.9	0	0	108	38	1	47.93	8.3	295.1
967	0	2.01	0.75	0.903	7	5	71.4	0	0	0	0	0	0	2	0	1	2	2	1	138.6	0	0	138	46	1	36.16	6	492.5
968	0	2.79	1.11	4.58	11	7	63.6	3	2	0	2	0	0	5	6	5	2	2	1	252.5	0	0	157	29	1	29.74	18.8	567.2
969	0	2.43	1.46	7.502	4	0	0	1	2	2	0	0	0	3	6	3	1	1	1	143.6	0	0	161	62	1	29.81	11.63	410.7
971	0	3.99	1.18	0.087	17	0	0	0	15	3	12	0	0	6	6	5	2	2	1	1358.8	0	0	139	45	1	4.75	34.9	598.8
972	1	3.84	1.21	3.564	7	5	71.4	0	0	0	0	0	0	2	0	1	2	2	1	153.4	0	0	134	40	1	36.12	6.3	489.8
973	0	1.51	1.02	0.534	3	0	0	0	0	0	0	0	0	2	0	1	2	2	1	199.7	0	0	130	30	1	52.17	8.28	376.3
974	0	2.18	1.23	2.846	17	7	41.2	0	8	6	0	2	0	3	6	5	2	2	1	159.5	0	0	112	65	1	26.61	13.79	328
975	1	2.78	1.24	0.647	12	7	58.3	3	1	1	0	0	0	3	0	1	2	2	1	140.1	0	0	125	25	1	67.65	5.95	458.5
976	0	1.74	0.75	0.171	10	3	30	2	0	0	0	0	0	2	0	1	1	1	1	1337.8	0	0	182	71	1	3.81	24.45	552.5
977	0	2.49	0.58	0.13	5	2	40	1	0	0	0	0	0	2	6	5	3	3	1	155.7	0	0	94	20	1	24.98	7.59	289.8
978	0	2.17	0.95	2.903	15	5	33.3	4	11	0	6	5	0	3	6	3	2	2	1	271.7	0	0	152	53	1	20.48	14.4	478.9
979	1	4.77	1.07	0.605	9	4	44.4	2	1	1	0	0	0	0	6	3	2	2	1	138.7	0	0	133	31	1	57.03	7.87	618.6
981	0	2.65	0.88	0.768	8	3	37.5	1	1	0	1	0	0	2	0	1	3	3	1	527	0	0	138	64	1	8.9	18.53	384.6
982	0	4.34	1.33	0.626	13	10	76.9	0	0	0	0	0	0	2	0	1	3	3	1	144.7	0	0	137	48	1	70.38	7.67	575.9
983	0	1.33	0.69	5.161	31	16	51.6	10	0	0	0	0	0	4	5	5	3	3	1	179	0	0	136	37	1	49.54	7.35	256.9
984	1	2.69	0.97	0.976	19	7	36.8	3	0	0	0	0	0	3	0	1	2	2	1	135.6	0	0	134	65	1	47.62	6.3	386
985	0	3.85	1.21	11.21	10	1	10	3	0	0	0	0	0	3	6	5	2	2	1	137.4	0	0	150	68	1	42.54	11.5	396.4
986	1	2.02	0.75	2.112	4	0	0	0	0	0	0	0	0	3	0	3	1	1	1	148.1	0	0	126	46	1	42.47	12.57	272.4
987	0	1.85	1.19	0.729	13	5	38.5	0	8	3	2	3	0	3	6	5	0	0	0	774.8	0	0	179	58	1	7.75	30.9	656
988	0	3.03	1.43	0.729	12	6	50	1	0	0	0	0	0	3	0	1	2	2	1	134.9	0	0	148	48	1	55.36	11.01	541.4
989	0	2.38	1.05	2.933	11	4	36.4	5	6	3	0	3	0	6	6	5	4	4	1	238.3	0	0	129	65	1	17.44	21.36	375.7
990	0	1.59	0.99	1.721	18	8	44.4	3	4	0	1	3	0	3	6	5	3	3	1	209.6	0	0	139	58	1	23.31	10.5	422.3
992	1	0.97	0.7	0.362	31	13	41.9	11	0	0	0	0	0	4	6	5	2	2	1	135	0	0	126	18	1	75.03	6.8	372
993	0	2.89	0.82	0.63	3	1	33.3	0	0	0	0	0	0	2	0	1	1	1	1	138.6	0	0	118	44	1	31.86	13.97	528.1
994	0	1.58	0.7	5.379	11	8	72.7	2	0	0	0	0	0	3	6	5	2	2	1	937.5	0	0	170	27	1	9.93	19.8	254
995	0	1.44	0.75	4.09	14	0	0	2	0	0	0	0	0	3	6	3	1	1	1	122.3	0	0	145	32	1	78.21	9.37	481.5
996	0	1.16	1.05	3.592	13	4	30.1	6	2	0	0	2	0	3	6	5	2	2	1	144	0	0	142	69	1	45.48	13.4	541.8
997	0	2.61	0.91	10.987	16	0	0	0	0	0	0	0	0	2	0	1	0	0	0	133.3	0	0	130	26	1	89.41	8.6	404.4
998	0	2.57	0.72	1.63	7	4	57.1	1	0	0	0	0	0	2	0	1	3	3	1	229.4	0	0	140	29	1	34.52	8.28	664.7
999	1	1.47	0.75	2.897	5	0	0	3	0	0	0	0	0	3	0	1	2	2	1	175	0	0	135	43	1	36.8	13.7	506.7
1000	0	2.75	0.86	0.312	8	5	62.5	0	0	0	0	0	0	2	6	5	3	3	1	891	0	0	156	54	1	5.94	44.2	594.2
1001	1	1.15	0.93	0.47	9	3	33.3	0	0	0	0	0	0	2	0	1	1	1	1	134.8	1	0	127	34	1	71.57	6.69	373.5
1003	0	0.41	0.94	7.673	12	1	8.3	0	0	0	0	0	0	3	5	0	3	3	1	258.8	0	0	137	40	1	24.71	10.6	431
1004	0	1.58	0.82	2.161	12	6	50	1	0	0	0	0	1	2	0	1	1	1	1	147.1	0	0	129	31	1	53.77	9.63	530.3
1005	0	2.06	0.68	0.263	24	14	58.3	0	4	0	0	4	0	2	6	5	4	4	1	170.3	0	0	140	24	1	54.04	8.02	333.6
1006	0	1.39	0.5	0.685	12	7	58.3	3	1	0	0	1	0	3	6	5	2	2	1	210	0	0	160	16	1	24.69	16.23	479.6
1007	0	2.64	0.73	2.206	11	5	45.5	4	2	0	2	0	0	3	6	3	2	2	1	142.6	0	0	140	32	1	61.48	10	356.3
1008	0	2.33	0.78	4	11	2	18.2	0	8	0	6	2	0	3	6	5	1	1	1	708.7	0	0	87	59	1	8.36	18.5	222.5
1009	0	1.41	0.83	4.98	13	2	15.4	4	9	0	7	2	0	3	6	5	2	2	1	222.3	0	0	112	26	1	39.74	9.85	376.7
1010	0	0.95	1.08	0.318	10	5	50	1	0	0	0	0	0	3	6	3	2	2	1	190.7	0	0	171	45	1	32.81	9.44	406.3
1011	0	2.96	0.84	0.487	15	1	6.7	0	0	0	0	0	0	2	6	0	1	1	1	413.6	0	0	141	47	1	19.08	19.7	279.3
1012	0	1.8	0.79	2.849	11	3	27.3	3	8	0	8	0	0	6	6	5	2	2	1	399.2	0	0	189	61	1	13.14	27.95	587.9
1013	0	2.17	0.98	3.471	15	12	80	3	0	0	0	0	0	0	6	5	4	4	1	315.6	0	0	103	38	1	25.84	14.95	565.6
1014	0	1.05	0.98	0.051	3	0	0	0	0	0	0	0	0	2	0	1	1	1	1	804	0	0	138	60	1	5.63	15.73	391
1015	1	7.45	0.83	3.922	11	2	18.2	3	0	0	0	0	3	3	6	3	2	2	1	227.5	0	0	122	56	1	26.8	13.95	651
1016	0	3.64	1.03	0.346	4	1	25	1	0	0	0	0	1	3	0	1	1	1	1	140.1	0	0	103	37	1	35.36	17	567.7
1017	0	1.98	0.42	2.01	7	5	71.4	2	0	0	0	0	0	6	6	5	1	1	1	505	0	0	145	27	1	14.97	37.2	514
1018	0	1.72	0.88	2.21	39	28	71.8	5	0	0	0	0	2	2	6	5	4	4	1	246.4	0	0	147	43	1	18.11	17.2	521.4
1019	0	4.17	1.06	0.577	5	0	0	1	0	0	0	0	0	3	6	3	0	0	1	744.5	0	0	135	25	1	8.07	16.83	470
1020	1	1.71	0.83	5.119	6	0	0	0	0	0	0	0	0	2	0	1	1	1	1	247.2	0	0	133	46	1	27.83	12.9	229
1021	0	1.37	0.98	1.154	19	7	36.8	1	0	0	0	0	0	3	0	1	2	2	1	120.2	0	0	117	55	1	63.06	7.78	368
1022	1	2.76	1.16	0.446	12	1	8.3	1	0	0	0	0	1	3	6	1	1	1	1	159.1	0	0	139	38	1	45.58	5.77	235.5
1023	0	2.04	1.43	0.901	16	8	50	5	0	0	0	0	0	3	5	5	2	2	1	237	0	0	129	21	1	44.78	15.1	1137
1024	0	2.02	0.29	2.819	12	2	0	2	0	0	0	0	0	6	6	5	1	1	1	167	0	0	186	65	1	38.12	12.23	484
1025	0	3.64	1.06	0	16	1	6.3	0	14	0	14	0	0	3	6	5	1	1	1	1160	0	0	126	41	1	4.46	16.14	445
1026	0	2.23	1.22	0.107	15	4	26.7	0	0	0	0	0	1	2	0	1	1	1	1	157.6	0	0	126	49	1	39.06	15.6	399
1027	1	2.01	0.78	3.512	18	6	33.3	8	0	0	0	0	0	5	6	5	3	3	1	378	0	0	128	19	1	24.81	22.1	425
1028	0	1.33	0.88	0.499	30	20	66.7	8	0	0	0	0	0	3	6	1	2	2	1	158	0	0	132	26	1	34.7	11.5	456
1029	0	1.62	1.23	0.433	8	6	75	0	0	0	0	0	0	2	0	1	4	4	1	67	0	0	111	48	1	77.52	2.41	367
1031	0	1.47	1.16	0.28	18	11	61.1	1	16	0	6	10	0	0	6	5	2	2	1	1142	0	0	149	44	1	6.51	15.6	370
1032	0	3.45	0.91	3.583	18	9	50	3	0	0	0	0	0	3	6	5	2	2	1	191.4	0	0	133	30	1	53.02	6.7	394
1033	1	2.42	0.65	10.668	21	1	4.8	2	3	0	3	0	0	4	6	5	1	1	1	213.4	0	0	161	38	1	63.49	9.3	493
1034	0	7.7	1.73	10.57	2	0	0	0	0	0	0	0	0	2	0	2	3	3	1	463	0	0	121	56	1	9.86	11.4	638
1035	0	1.47	1.46	12.561	26	0	0	0	0	0	0	0	0	2	0	1	0	0	1	171	0	0	123	28	1	60.42	14.8	681
1036	0	1.71	1.03	6.679	22	0	0	1	0	0	0	0	0	2	0	1	1	1	1	129.2	0	0	180	47	1	60.21	15.3	670
1038	0	2	1.09	10.681	11	1	9.1	0	0	0	0	0	0	5	6	5	1	1	1	142	0	0	147	64	1	36.93	9	258
1039	1	2.16	1.54	0.415	13	3	23.1	2	1	0	1	0	0	3	6	1	3	3	1	144	0	0	186	34	1	77.87	6	325
1040	1	0.7	1.31	2.53	9	1	11.1	0	0	0	0	0	0	2	0	1	0	0	1	392	0	0	119	57	1	16.93	14.2	703
1041	0	2.92	1.05	6.818	7	4	57.1	1	0	0	0	0	1	2	6	1	2	2	1	402	0	0	129	43	1	20.18	26	533
1042	0	1.31	1.21	5.683	19	1	5.3	0	18	1	17	0	0	0	6	5	1	1	1	974	0	0	129	25	1	8.13	19.6	401
1043	0	1.97	0.7	3.629	13	5	38.5	2	2	2	0	0	0	3	6	5	2	2	1	404	0	0	127	45	1	18.66	20	505
1044	0	2.87	1.02	2.3	10	2	20	0	0	0	0	0	0	6	6	5	3	3	1	113	0	0	154	51	1	48.58	7.92	451
1045	0	3.6	0.5	1.043	18	5	27.8	2	7	0	3	4	2	4	6	5	2	2	1	198	0	0	160	22	1	24.3	18	438
1046	0	1.6	1.3	5.216	9	4	44.4	2	1	0	1	0	1	4	6	3	2	2	1	162.3	0	0	162	62	1	37.83	6.2	407
1047	0	2.19	1.32	0.236	16	1	6.3	0	0	0	0	0	2	2	0	1	1	1	1	220	0	0	140	43	1	35.52	9.6	367.5
1048	0	1.56	0.79	0.238	13	2	15.4	0	0	0	0	0	0	2	0	1	1	1	0	863	0	0	154	48	1	7.36	16.42	438
1049	1	2.45	1.25	2.763	10	3	30	3	2	2	0	0	0	3	6	2	2	2	1	156	0	0	171	39	1	37.91	7.45	391
1050	0	3.9	0.175	7.177	15	0	0	0	0	0	0	0	0	6	5	5	0	0	0	58.4	0	0	129	32	1	150.13	5.79	387
1051	0	1.44	1.27	6.922	8	0	0	0	0	0	0	0	0	2	0	1	0	1	1	1306	0	0	151	21	1	11.21	35	742
1055	0	3.71	0.8	0.286	15	3	0	2	0	0	0	0	0	2	0	3	3	3	1	121.9	0	0	135	57	1	55.27	5.38	290
1056	1	0.79	0.5	1.37	20	2	0	0	3	1	2	0	0	5	6	3	2	2	1	114	0	0	152	36	1	71.81	7.6	544
1057	0	1.85	0.85	3.505	10	3	0	1	6	3	3	0	1	6	6	5	3	3	1	847	0	0	127	59	1	5.65	26	212
1058	0	2.53	1.13	1.913	11	9	82	0	0	0	0	0	0	3	0	2	2	2	1	232	0	0	131	18	1	29.75	19.6	593
1060	0	3.27	0.18	2.025	8	1	0	2	4	4	0	0	0	6	6	5	1	1	1	160	0	0	152	47	1	36.46	17.7	329
1061	0	2.04	0.99	13.4	9	2	22.2	3	0	0	0	0	0	2	6	4	1	1	1	157	0	0	171	69	1	38.38	7.08	277
1062	0	2.66	1.45	0.771	11	0	0	0	0	0	0	0	0	3	0	1	0	0	1	1473	0	0	145	47	1	4.66	36.4	850
1063	1	1.86	1.41	5.46	13	1	7.7	3	0	0	0	0	2	2	0	1	1	1	1	170	0	0	155	64	1	37.94	15.6	421
1064	0	2.75	0.56	0.244	18	6	33.3	2	5	5	0	0	0	3	6	5	2	2	1	256	0	0	131	61	1	17.84	21.53	319
1065	0	1.35	0.9	3.662	8	4	50	1	0	0	0	0	0	2	0	1	3	3	1	139.4	0	0	136	35	1	44.1	5.37	402
1066	0	2.52	1.12	2.27	4	1	25	0	0	0	0	0	0	5	6	3	2	2	1	192	0	0	134	68	1	27.68	12.73	476
1067	0	1.99	0.92	0.151	13	8	61.5	0	0	0	0	0	0	2	6	1	2	2	1	167	0	0	162	27	1	50.77	7.55	443
1068	0	1.72	1.06	15.545	9	3	33.3	0	0	0	0	0	0	6	6	5	3	3	1	332	0	0	158	30	1	31.38	9.2	320
1069	1	3.07	1.53	0.496	9	6	33.3	2	0	0	0	0	0	3	6	2	3	3	1	142	1	0	124	51	1	36.7	7.21	556
1073	1	2.63	1.02	1.407	17	6	35.3	4	0	0	0	0	0	3	0	1	2	2	1	150	0	0	181	60	1	35.13	7.86	405
1074	1	3.42	1.26	5.66	13	2	15.4	1	0	0	0	0	1	2	0	1	1	1	1	153	0	0	138	48	1	35.21	19.24	373
1075	0	1.62	0.74	2.175	15	13	86.7	2	4	0	0	4	0	0	0	5	3	3	1	471	0	0	162	53	1	9.66	28.2	333
1076	0	2.65	0.96	0.536	7	1	14.3	0	0	0	0	0	0	2	0	2	2	2	1	153	0	0	130	64	1	51.02	7.2	438
1077	0	2.47	0.71	8.309	16	3	18.8	1	0	0	0	0	0	3	6	2	1	1	1	128	0	0	151	59	1	45.92	10.13	401
1078	0	1.87	0.76	12.446	18	0	0	1	0	0	0	0	1	5	6	5	0	0	0	138.7	0	0	134	23	1	53.95	26.07	469
1080	0	1.99	1.65	0.08	13	2	15.4	3	0	0	0	0	0	3	6	1	2	2	1	795	0	0	115	45	1	9.99	23.8	570
1081	0	2.27	1.08	6.635	21	12	57.1	2	0	0	0	0	0	3	6	3	2	2	1	191.5	0	0	131	57	1	28.25	16.2	555
1082	0	2.29	0.75	2.868	13	2	15.4	2	0	0	0	0	0	2	6	1	1	1	1	362	0	0	147	65	1	15.29	28.5	560
1083	1	2.78	1.06	0.693	9	5	55.6	2	1	0	0	1	0	3	6	3	2	2	1	148.3	0	0	146	43	1	45.46	5.32	349
1084	0	2.39	0.72	3.835	12	1	8.3	0	0	0	0	0	0	2	6	2	1	1	1	149.6	0	0	134	60	1	39.47	18.94	723
1085	0	2.76	0.87	0.837	15	2	13.3	3	1	1	0	0	0	2	0	1	2	2	1	109.2	0	0	129	49	1	48.79	8.66	452
1086	0	2.84	0.81	3.039	20	2	10	0	0	0	0	0	0	3	0	1	1	1	1	381	0	0	161	71	1	13.59	25.82	467
1087	1	2.76	0.7	5.1	7	2	28.6	3	0	0	0	0	0	2	6	3	2	2	1	259	0	0	132	24	1	26.44	13.24	585.3
1088	0	3.74	0.84	0.652	9	1	11.1	0	0	0	0	0	0	3	0	3	1	1	1	537.3	0	0	125	70	1	8.87	23.8	304
1089	0	1.92	0.85	2.023	11	3	27.3	3	0	0	0	0	0	2	6	5	3	3	1	269	0	0	132	32	1	18.13	9.2	321.4
1090	0	2.23	0.7	0.785	20	3	15	0	6	0	4	2	0	3	0	3	1	1	1	575	0	0	121	79	1	5.71	31.3	420.6
1091	0	1.28	0.96	3.698	17	2	11.8	1	0	0	0	0	0	3	6	3	2	2	1	131	0	0	150	56	1	44.17	6.87	486.3
1092	0	2.8	1.05	6.638	12	5	41.7	0	0	0	0	0	0	5	6	5	3	3	1	138.2	0	0	121	33	1	78.09	6.46	440
1093	1	1.49	1.27	10.21	24	1	4.2	0	0	0	0	0	0	4	0	1	1	1	1	161.2	0	0	103	25	1	64.06	15.1	530.5
1094	0	2.38	0.86	0.772	10	5	50	2	0	0	0	0	0	3	0	1	2	2	1	145.4	0	0	98	59	1	50.71	7.98	575.6
1095	0	2.03	1	0.789	2	1	50	0	0	0	0	0	0	3	6	5	3	3	1	1562.8	0	0	168	57	1	3.5	22	569.7
1096	1	2.1	0.89	0.967	9	2	22.2	2	0	0	0	0	0	3	0	1	2	2	1	139.9	1	0	130	26	1	74.17	7.47	450
1097	1	1.7	1.22	0	11	4	36.4	1	0	0	0	0	0	0	6	5	3	3	1	162.4	0	0	145	43	1	54.37	12.7	513.8
1099	0	2.7	1.02	0.319	20	4	20	3	0	0	0	0	0	3	6	5	1	1	1	135.7	0	0	194	71	1	36.27	11.12	499.6
1100	0	2.23	0.84	9.345	7	1	14.3	0	2	0	2	0	0	6	6	5	2	2	1	223.2	0	0	112	31	1	25.78	12.49	556
1101	0	3.07	0.35	5.294	6	0	0	0	0	0	0	0	0	3	7	5	1	1	1	254.4	0	0	114	39	1	19.51	20.7	612
1102	0	1.29	0.85	16.681	7	2	28.6	0	0	0	0	0	0	2	0	1	1	1	1	587.4	0	0	113	32	1	14.81	60	543.1
1104	0	2.73	1.01	0.312	10	0	0	2	2	0	2	0	0	2	6	1	0	0	0	371.5	0	0	143	67	1	8.83	14.6	464.5
1105	0	2.09	1.19	2.644	8	2	25	2	1	0	1	0	0	2	6	3	3	3	1	676.7	0	0	96	31	1	12.97	12.23	452.5
1106	1	4.01	1.21	2.394	10	6	60	3	0	0	0	0	0	2	6	3	2	2	1	188.1	0	0	131	32	1	39.55	7.8	575.7
1107	0	1.25	0.91	9.712	14	9	64.2	5	2	0	2	0	0	3	6	5	4	4	1	384.4	0	0	145	19	1	21.39	18.54	494
1108	0	0.7	1.17	4.468	7	0	0	1	0	0	0	0	0	2	6	3	2	2	1	218	0	0	117	16	1	30.33	12.03	390
1109	0	2.58	0.83	1.163	18	4	22.2	0	4	0	0	4	0	2	0	1	2	2	1	153.8	0	0	171	63	1	37.56	6	115.5
1110	0	1.96	1.44	0.326	19	10	52.6	0	0	0	0	0	0	2	0	1	3	3	1	143.5	0	0	129	48	1	34.18	7.07	264
1111	1	2.64	0.71	2.808	7	0	0	2	0	0	0	0	0	3	0	1	1	1	1	97.2	0	0	134	62	1	62.18	9.52	374
1112	0	1.78	1.11	8.487	12	8	75	2	0	0	0	0	0	2	0	1	4	4	1	310.6	0	0	155	27	1	40.27	10.18	586.3
1114	0	0.87	0.85	3.271	9	2	22.2	2	1	1	0	0	0	6	6	5	3	3	1	187.3	0	0	158	73	1	28.6	16	371.5
1115	0	2.27	1.15	0.183	13	6	46.2	1	0	0	0	0	0	3	6	3	4	3	1	651	0	0	127	31	1	9.45	14	436.2
1116	1	1.18	0.78	0	7	3	42.9	3	0	0	0	0	0	2	6	3	3	3	1	161.6	1	0	139	30	1	30.6	8.4	335.3
1117	0	0.88	1.19	0	2	0	0	0	0	0	0	0	0	3	6	1	2	2	1	145.5	0	0	164	44	1	47.88	14.7	389.1
1121	1	4.78	1.27	12.256	20	11	55	3	0	0	0	0	0	3	0	1	3	3	1	144.7	0	0	182	70	1	45.22	9.9	249.6
1123	0	2.92	1.25	1.371	8	1	12.5	3	3	0	3	0	0	2	0	1	1	1	1	144.9	0	0	135	56	1	25.46	7.6	400
1124	0	0.8	1.05	8.69	13	4	30.8	0	4	0	0	4	0	4	5	3	3	3	1	158.2	0	0	184	20	1	51.31	13.59	532
1125	0	4.96	0.67	4.768	6	4	66.7	1	1	0	0	1	0	3	6	3	3	3	1	209.1	0	0	135	43	1	32.81	12.63	491.2
1126	0	0.63	0.98	0	16	6	37.5	0	0	0	0	0	1	6	6	5	2	2	1	229.5	0	0	135	39	1	33.56	8.86	357.7
1127	0	1.49	0.83	0.817	14	3	21.4	3	0	0	0	0	0	2	0	1	2	2	1	131.7	0	0	138	44	1	55.59	4.25	363.4
1128	0	2.87	0.8	2.576	12	8	66.7	4	0	0	0	0	0	0	6	5	3	3	1	175.7	0	0	133	42	1	30.62	12.51	514.6
1129	0	2.41	0.72	0.323	3	0	0	2	0	0	0	0	0	2	6	3	2	2	1	151.4	0	0	139	22	1	41.56	11.7	445.3
1130	0	2.28	1.19	0	13	3	23.1	2	2	0	0	2	0	3	6	3	4	4	1	256.3	0	0	132	39	1	32.72	18.08	972.9
1131	0	0.4	0.82	5.304	11	0	0	0	0	0	0	0	0	2	0	1	0	0	0	154.9	0	0	115	23	1	51.1	16	405.3
1132	0	1.74	1.08	1.937	8	6	75	1	6	0	0	6	0	0	0	5	2	2	1	172.4	0	0	154	58	1	29.84	7.8	510.5
1158	0	4.32	1.69	0	15	5	33.33	0	0	0	0	0	0	2	5	1	2	2	1	290.8	0	0	183	58	1	17.34	21.6	647.3
1165	0	2.42	0.72	0	11	10	90.9	1	7	0	6	1	0	0	3	4	4	4	1	753.8	0	0	172	23	1	9.09	12.58	543.3
1166	1	6.14	1.1	3.09	11	5	45.5	1	1	1	0	0	0	4	6	2	2	2	1	797.8	0	0	178	67	1	7.43	26.61	570.3
1170	1	1.86	1.08	0.406	22	0	0	0	0	0	0	0	0	2	0	1	1	1	1	132.2	0	0	154	21	1	80.82	15.22	367.4
1171	1	3.47	0.66	7.758	9	0	0	0	0	0	0	0	0	2	0	1	1	1	1	184.5	0	0	136	58	1	30.9	15.05	514.7
1172	0	1.64	1.12	3.351	9	9	100	0	9	0	0	9	0	0	0	0	4	4	1	664.7	0	0	151	50	1	12.16	23.2	630.5
1173	0	2.96	0.59	2.736	11	4	36.4	0	10	0	10	0	0	3	4	3	3	3	1	231.9	0	0	170	65	1	15.22	13.85	462.6
1174	1	2.89	1.43	9.835	27	0	0	0	0	0	0	0	0	2	0	1	1	1	0	147.6	0	0	148	20	1	63.5	15.17	476.9
1175	1	1.64	1.23	13.924	9	0	0	5	1	1	0	0	0	2	6	2	2	2	0	321.3	0	0	133	24	1	28.42	10.09	224
1176	0	1.33	0.84	0.272	10	1	10	0	0	0	0	0	0	2	0	1	3	3	1	873.3	0	0	141	37	1	5.43	8.76	300
1177	0	2.34	1	1.67	8	3	37.5	0	1	0	1	0	0	2	0	1	2	2	1	216.2	0	0	130	39	1	35.63	6.17	461.8
1178	0	2.45	1.24	1.19	17	0	0	0	0	0	0	0	0	2	0	1	0	0	0	149.2	0	0	141	23	1	64.62	11.84	347.8
1179	0	2.69	1.12	4.961	21	10	47.6	0	17	0	17	0	0	2	6	3	3	3	1	673.4	0	0	117	21	1	13.69	19.2	393
1181	0	2.87	1.41	8.143	17	4	23.5	2	0	0	0	0	0	3	6	3	2	2	1	154.7	0	0	154	60	1	39.12	10.18	416.8
1182	1	3.16	0.93	2.14	12	6	50	1	0	0	0	0	0	2	6	3	3	3	1	131.9	0	0	165	58	1	51.23	7.17	282.8
1184	0	1.17	0.48	0	20	5	25	12	12	0	0	0	0	3	6	3	2	2	1	197.4	0	0	165	22	1	38.75	14.13	494.4
1185	0	2.62	0.32	2.06	7	0	0	0	5	3	2	0	0	6	6	3	2	2	1	177	0	0	180	45	1	38.72	30.26	999.6
1187	0	3.06	1.06	1.764	12	8	66.7	3	1	0	1	0	0	2	6	3	3	3	1	137.4	0	0	168	54	1	36.97	16.34	444.3
1188	0	2.79	1.1	2	6	0	0	0	0	0	0	0	0	2	6	2	3	3	1	161.9	0	0	109	62	1	48	8.89	528.2
1189	1	1.85	0.8	0	13	8	61.5	3	0	0	0	0	0	2	6	3	2	2	1	102	0	0	134	35	1	53.81	4.2	365.7
1190	0	2.09	1.01	2.297	11	9	81.8	1	5	2	3	0	0	2	0	3	4	4	1	431	0	0	124	21	1	13.86	10.93	488.8
1192	0	3.6	0.33	0	7	5	71.4	0	2	0	0	2	0	2	6	3	3	3	1	614.2	0	0	161	38	1	9.72	20.5	405
1194	0	1.91	0.29	0	20	3	15	1	4	4	0	0	1	3	5	4	2	2	1	682.3	0	0	125	27	1	10.56	13.42	514
1196	1	1.16	0.67	2.147	20	13	65	2	0	0	0	0	0	2	6	3	3	3	1	174.9	0	0	146	23	1	35.67	11.78	545.6
1197	0	1.27	0.84	3.425	13	0	0	0	0	0	0	0	0	2	0	1	1	1	1	301.5	0	0	144	21	1	33.01	23.6	746.5
1198	0	1.88	1.13	0.854	13	6	46.2	1	10	2	4	4	0	2	6	3	2	2	1	344	0	0	120	28	1	26.83	14.28	630.7
1199	0	1.4	1	0.733	4	3	75	0	0	0	0	0	0	2	0	2	3	3	1	147.1	0	0	120	26	1	42.94	8.42	532.7
1200	0	1.55	0.89	10.299	10	0	0	1	0	0	0	0	2	2	0	1	0	0	0	171.5	0	0	136	19	1	58.14	13.78	497
1203	0	2.32	1.18	6.873	9	0	0	0	0	0	0	0	0	2	0	2	1	1	1	454.3	0	0	138	21	1	16.43	38.57	669.1
1204	0	2.35	1.26	3.174	38	6	15.8	2	0	0	0	0	0	2	0	1	1	1	1	164.3	0	0	172	63	1	39.2	14.95	414.8
1205	0	2.21	0.26	5.435	14	0	0	0	0	0	0	0	0	6	6	3	1	1	1	170.3	0	0	125	19	1	53.75	21.68	680.3
1207	0	3.4	1.97	8.184	14	9	64.2	3	4	0	3	1	0	3	6	3	3	3	1	173.8	0	0	153	28	1	51.88	7.3	575.8
1208	0	2.63	0.69	3.968	7	2	28.6	1	3	0	3	0	0	0	6	3	3	3	1	135.8	0	0	124	34	1	38.76	14.98	448.1
1209	1	2.52	1.11	0.563	16	5	31.3	5	0	0	0	0	0	2	0	1	2	2	1	117.7	0	0	106	30	1	51.3	5.51	437.1
1210	1	1.37	0.84	7.676	10	0	0	3	3	3	0	0	0	0	0	1	2	2	1	190.8	0	0	135	76	1	39.4	19.21	432
1211	1	4.33	1.03	0.456	11	4	36.4	1	0	0	0	0	0	2	0	0	2	2	1	152.9	0	0	131	46	1	52.93	6.68	334
1212	1	3.58	1.8	12.993	15	4	26.7	0	0	0	0	0	0	2	0	2	1	1	1	221.8	1	0	155	39	1	53.21	18.3	609.3
1213	0	0.91	1.21	7.64	14	3	21.4	2	3	3	0	0	0	2	6	2	3	3	1	206.8	0	0	190	63	1	30.23	12.9	325.7
1214	0	1.95	1.13	6.504	22	3	13.6	2	0	0	0	0	0	2	0	1	2	2	1	430.1	0	0	135	39	1	19.21	32.16	652
1216	1	2.59	1.02	5.746	9	4	44.4	3	1	1	0	0	0	2	0	1	3	3	1	260.5	0	0	150	32	1	33.15	12.76	547.3
1217	0	13.9	0.65	2.02	9	7	77.8	0	0	0	0	0	0	3	6	2	2	2	1	167.6	0	0	76	72	1	27.45	5.22	330.8
1218	1	2.5	0.98	0	12	5	41.7	2	0	0	0	0	0	2	0	1	2	2	1	122.9	0	0	135	26	1	61.04	6.82	359.8
1219	1	1.6	0.87	7.78	14	2	0	2	0	0	0	0	0	2	6	2	2	2	1	332.9	1	0	170	50	1	19.22	16.39	339.5
1220	0	2.34	0.99	1.024	12	6	50	3	0	0	0	0	0	3	6	0	2	2	1	151.2	0	0	149	23	1	64.72	5.4	535.3
1221	1	3.99	1.48	6.64	13	2	15.4	3	1	1	0	0	0	3	0	2	3	4	1	187.5	0	0	157	56	1	31.41	12.26	479.2
1222	0	2.45	0.9	5.153	6	3	50	2	1	0	1	0	0	4	6	0	3	4	1	582.2	0	0	175	66	1	15.09	17.8	353.4
1223	1	1.85	0.42	1.387	14	1	7.1	4	5	0	5	0	0	3	0	3	2	2	1	840.7	0	0	150	45	1	8.15	38.8	628.4
1224	0	4.21	0.86	3.916	15	13	86.7	2	0	0	0	0	0	3	6	3	3	3	1	294.1	0	0	162	53	1	15.93	14.4	470.5
1225	0	1.27	0.7	3.516	17	10	58.8	4	2	0	2	0	0	6	6	4	4	4	1	237.6	0	0	160	23	1	31.15	11.3	228.7
1226	0	5.19	1.51	1.17	14	0	0	2	5	5	0	0	0	2	6	4	3	3	1	278.2	0	0	146	48	1	21.56	15.16	399.2
1227	0	1.06	0.73	8.97	36	32	88.9	1	0	0	0	0	0	2	5	2	3	3	1	334.7	0	0	116	47	1	15.69	8.58	473.1
1232	0	2.51	0.85	0.62	9	8	88.9	1	4	0	0	4	0	0	6	4	4	4	1	1136.2	0	0	146	25	1	6.19	25.2	458.9
1233	0	2.74	0.68	0.7	9	2	22.2	5	1	0	0	1	0	2	6	4	3	3	1	152.3	0	0	85	38	1	31.16	6.62	544.4
1239	1	2.31	1.04	5.727	16	0	0	2	0	0	0	0	0	2	5	2	2	2	1	368.9	0	0	150	33	1	20.69	28.8	115.1
1241	1	2.89	0.67	5.798	6	3	50	2	1	0	1	0	2	3	6	4	3	3	1	156	1	0	145	25	1	39.69	9.4	377.9
1242	1	2.43	1.04	0.069	19	0	0	1	0	0	0	0	0	2	0	2	1	1	1	132.7	0	0	115	23	1	72.66	5.26	316.7
1243	0	2.32	0.78	3.705	12	2	16.7	0	0	0	0	0	0	3	6	5	3	3	1	195.1	0	0	152	67	1	27.71	10.81	407.6
1244	0	1.95	0.73	1.982	6	0	0	0	3	3	0	0	0	3	5	2	1	1	1	705.1	0	0	150	15	1	9.49	325.6	522.8
1245	0	2.6	0.43	2.952	21	5	0	0	3	3	0	0	0	3	6	5	2	2	1	168.5	0	0	164	33	1	49.21	19.45	583.5
1246	0	1.03	0.48	7.988	10	2	20	0	0	0	0	0	0	3	5	2	2	2	1	259.9	0	0	130	47	1	33.01	32.69	710.5
1247	0	2.3	1.19	4.29	11	4	36.4	0	2	0	2	0	0	6	1	3	3	3	1	257.5	0	0	110	22	1	35.51	12.2	599.7
1248	0	1.74	0.46	2.553	11	2	18.2	2	0	0	0	0	1	6	5	3	3	3	1	139.7	0	0	120	41	1	37.79	18.54	586.4
1254	0	3.44	0.97	4.898	9	0	0	0	0	0	0	0	0	2	5	2	2	2	1	293.2	0	0	180	69	1	20.55	37.65	456.6
1255	0	1.67	0.87	3.692	10	3	30	0	6	4	0	2	0	2	0	2	3	3	1	214.1	0	0	130	25	1	30.32	12.88	464.8
1256	1	1.72	1.23	1.313	9	3	0	4	0	0	0	0	1	2	6	5	2	2	1	175	1	0	130	33	1	52.64	9	587.9
1258	1	1.63	0.83	3.868	25	7	28	2	2	2	0	0	0	3	3	5	2	2	1	214.4	1	0	130	55	1	33.65	27.69	538.2
1259	0	2.26	0.98	8.054	18	0	0	0	0	0	0	0	0	3	0	1	0	0	1	273.4	0	0	160	47	1	30.54	26.79	564.3
1260	0	1.96	1.05	3.988	9	1	11.1	4	1	1	0	0	3	3	5	3	2	2	1	165.5	0	0	180	27	1	52.07	7.9	438.8
1261	0	0.65	1.2	0.774	19	11	0	1	3	0	0	3	0	2	0	2	3	3	1	152	0	0	95	20	1	60.21	8.6	486.5
1262	1	2.32	1.64	0	22	0	0	0	0	0	0	0	0	2	0	2	0	0	0	152.8	1	0	110	16	1	47.41	8	445.6
1265	1	3.39	1.17	1.143	13	1	0	1	0	0	0	0	0	3	6	2	1	3	1	200	1	0	142	42	1	33.15	7.44	429.1
1267	1	3.04	0.77	0.469	8	1	0	2	0	0	0	0	2	2	4	2	3	3	1	179.5	0	1	131	37	1	28.8	7.72	336.7
1268	1	2.76	0.85	1.385	7	4	0	3	0	0	0	0	0	3	0	3	3	3	1	249	0	0	150	27	1	36.28	7.96	563.7
1270	1	1.08	1.43	2.314	9	6	66.7	0	0	0	0	0	0	2	5	5	3	3	1	253.8	0	0	179	24	1	29.23	9.01	384.5
1275	0	1.56	1.01	5.58	12	7	58.3	2	0	0	0	0	0	3	6	5	2	2	1	346	0	0	134	22	1	29.78	25.3	524.1
1276	0	2.36	0.69	1.206	14	1	7.1	2	7	4	2	1	0	3	6	5	2	3	1	630	0	0	120	41	1	11.6	37.25	488.9
1277	0	1.37	1.12	2.051	6	1	0	0	5	5	0	0	0	3	0	5	1	1	0	258.2	0	0	127	57	1	16.13	15.5	251.7
1278	1	4.33	1.48	5.732	7	6	0	1	0	0	0	0	0	0	0	0	3	4	1	257.2	2	0	123	51	1	33.2	12.8	555.7
1279	1	1.65	0.56	5.238	6	0	0	0	0	0	0	0	0	2	0	1	0	1	1	1296	0	0	117	44	1	5.56	45.4	495.1
1283	0	4.02	1.12	0	30	16	53.3	0	24	1	0	23	0	3	0	2	0	2	1	951	0	0	160	62	1	5.95	32.1	482
1284	0	2.47	1.16	4	9	5	0	0	6	0	3	3	0	3	3	5	4	4	1	335	0	0	177	40	1	27.54	11.4	434.6
1285	0	0.58	0.71	3.529	26	8	30.8	0	3	0	0	3	0	6	6	2	3	3	1	137.9	0	0	173	51	1	40.49	13.5	406.1
1287	1	2.78	1.09	0.757	12	6	50	2	0	0	0	0	2	2	0	2	3	3	1	119.9	0	0	145	36	1	75.75	8.04	417.9
1289	0	1.12	1.17	1.34	12	1	8.3	0	10	10	0	0	0	5	0	0	1	1	1	816.9	0	0	170	23	1	9.87	8.57	520.1
1290	0	2.58	0.75	0.319	8	5	62.5	2	0	0	0	0	0	1	0	0	3	3	1	310.6	0	0	145	30	1	25.27	7.35	456.4
1293	0	1.9	1.31	4.452	16	3	18.8	0	0	0	0	0	0	3	3	5	1	1	0	200.4	0	0	155	57	1	28.15	13.95	493.1
1294	0	2.96	1.9	2.694	24	2	8.3	2	0	0	0	0	0	2	0	1	1	1	0	180.7	0	0	190	58	1	36.28	13.72	524.6
1295	0	0.74	0.83	4.557	23	14	60.9	0	0	0	0	0	0	6	6	0	3	3	1	134.1	0	0	146	60	1	50.63	18.5	567
1296	1	1.49	1.11	3.721	11	0	0	4	2	2	0	0	0	3	0	3	0	0	0	138.7	0	1	134	15	1	49	9.31	282.6
1297	1	2.75	1.07	1.27	10	5	50	2	0	0	0	0	0	3	0	3	2	2	1	161.2	0	0	153	45	1	49.65	9.33	750
1298	0	0.77	0.48	17.81	16	0	0	5	10	5	5	0	0	5	6	5	0	0	0	250.5	0	0	145	21	1	28.81	9.47	276.6
1299	0	1.05	1	9.786	13	6	46.2	3	0	0	0	0	0	2	0	1	2	2	1	131	0	0	177	53	1	56.36	4.64	366.9
1300	0	1.13	0.88	9.3	14	0	0	0	4	4	0	0	0	7	2	5	1	1	1	154	0	0	160	35	1	52	14.36	302.1
1301	1	2.34	0.87	2.119	5	1	0	2	0	0	0	0	0	3	6	5	3	3	1	200.9	0	1	140	37	1	30.02	6.24	663.9
1303	0	1.85	1.12	4.266	19	0	0	0	0	0	0	0	0	2	6	2	1	1	1	191.4	0	0	110	21	1	75.71	14.06	519.4
1305	0	2.59	0.98	0.891	23	15	0	3	0	0	0	0	0	3	0	5	3	3	1	147.6	2	0	118	44	1	64	7.53	530.7
1306	1	2.13	0.64	5.3	11	9	0	0	0	0	0	0	0	3	3	5	3	3	1	272	1	0	200	25	1	22.1	14.21	432
1310	0	3.1	0.74	0.8	21	9	0	0	0	0	0	0	0	3	6	2	3	3	1	172.6	0	0	110	26	1	35.91	10.9	575.5
1311	0	1.02	0.71	0.05	13	1	0	2	0	0	0	0	0	2	0	2	2	2	1	138.5	1	0	104	42	1	36.99	7.59	311.5
1312	0	1.82	0.74	4.239	9	3	33.3	1	5	3	2	0	1	6	0	5	3	3	1	624	0	0	149	21	1	15.25	25	545
1313	0	1.65	0.8	0.643	9	4	0	1	0	0	0	0	0	2	6	5	2	2	1	164.1	0	0	165	32	1	43.35	8.77	365.4
1314	1	2.53	1.19	3.195	11	4	0	3	0	0	0	0	0	3	0	2	3	3	1	147.8	1	0	134	33	1	62.07	4.97	417.4
1315	1	3.54	0.8	11.688	18	0	0	0	0	0	0	0	0	2	0	2	1	1	1	220	0	0	153	43	1	34.11	20.67	505.4
1316	0	4.55	1.22	0.332	15	9	0	1	0	0	0	0	0	6	3	5	3	3	1	143.8	0	0	123	48	1	37.46	6.95	370.6
1317	0	1.65	0.67	14.356	7	0	0	0	0	0	0	0	0	1	0	2	1	1	1	772.9	0	0	140	29	1	11.66	23.82	496
1319	1	1.06	1.31	2	18	0	0	2	2	0	2	0	0	3	6	2	2	2	1	131.1	0	0	132	40	1	54.42	8.97	409.1
1320	1	1.96	0.93	2.334	14	7	50	0	0	0	0	0	0	2	0	5	3	3	1	166.6	2	0	108	25	1	51.79	9.45	531.6
1321	0	2.4	0.9	0.929	12	4	0	0	0	0	0	0	0	2	0	2	2	2	1	134	0	0	150	45	1	41.51	4.26	311.3
1322	1	4.95	0.86	0	6	0	0	0	0	0	0	0	0	1	6	2	1	1	1	1333	0	0	132	60	1	4.39	16	456
1323	0	2.89	0.49	5.203	7	2	0	1	1	1	0	0	0	6	5	5	2	2	1	271.7	0	0	131	42	1	17.72	15.64	505
1325	0	2.26	0.9	0.808	9	6	0	1	1	1	0	0	0	2	6	5	3	3	1	164.6	0	0	146	62	1	22.29	9.71	351.8
1330	1	1.45	0.4	0.511	17	3	0	0	0	0	0	0	0	2	0	2	1	1	0	139.5	0	0	148	42	1	54.01	5.26	385.6
1332	1	2.32	1.07	1.363	11	3	0	1	0	0	0	0	0	2	0	2	3	3	1	137	0	0	125	40	1	63.74	5.16	497.7
1333	1	1.03	1.06	5.367	11	4	0	2	0	0	0	0	0	2	0	2	3	3	0	485.4	0	0	152	22	1	18.09	41.34	591.2
1334	0	1.43	0.38	4.053	25	0	0	1	8	8	0	0	0	5	3	5	1	1	0	135.9	0	0	150	30	1	46.54	8.93	545.2
1337	1	1.56	0.89	2.214	7	3	0	1	0	0	0	0	0	3	0	2	2	2	0	121.8	0	0	134	38	1	45.53	6.04	465.8
1338	1	3.19	0.87	1.55	17	3	0	0	0	0	0	0	0	2	0	2	1	1	1	136.2	0	0	129	63	1	38.25	6.9	361.2
1339	0	1.41	0.35	6.472	11	0	0	0	2	0	2	0	0	5	0	5	2	2	1	211.9	0	0	135	26	1	30.65	14.51	578.2
1342	1	1.39	0.86	0.625	28	0	0	0	0	0	0	0	0	3	0	1	0	0	0	88.3	0	0	110	24	1	95.34	4.2	261.2
1343	0	4.05	0.26	3.231	9	0	0	1	0	0	0	0	0	3	6	2	2	1	1	250.9	0	0	155	25	1	31.15	31.51	811.6
1344	1	1.07	1.28	0	12	4	0	1	0	0	0	0	0	2	3	2	2	2	1	199.2	0	0	128	40	1	28.87	10.54	459.3
1346	0	1.82	0.91	0.891	10	2	20	2	0	0	0	0	0	2	0	2	2	2	1	165.7	0	0	145	40	1	58.64	7.2	684.4
1348	1	2.31	1.04	0.371	6	3	50	2	0	0	0	0	0	1	0	0	3	4	1	156.4	0	0	128	43	1	41.5	6.24	514.1
1350	0	2.37	0.71	0.355	12	0	0	0	10	0	10	0	0	1	0	0	2	2	1	371.2	0	0	143	53	1	11.03	28.06	435.6
1351	0	1.91	0.47	0	18	7	0	0	0	0	0	0	0	2	6	2	2	2	0	344	0	0	135	43	1	16.51	18.74	753.2
1353	0	1.09	0.87	4.995	11	0	0	0	0	0	0	0	0	2	5	1	0	0	0	619.3	0	0	170	16	1	10.05	16.91	448.6
1354	0	2.03	1.2	3.398	8	7	0	0	0	0	0	0	0	2	0	0	3	4	1	257.5	0	0	197	28	1	25.47	10.48	382
1355	0	2.36	0.94	5.164	10	4	40	0	9	0	4	5	0	3	3	5	3	3	1	372	0	0	140	54	1	16.44	17.46	436.2
1356	0	1.07	0.56	6.01	8	0	0	0	0	0	0	0	0	2	0	2	0	0	1	206.6	0	0	120	24	1	34.05	22.16	772.6
1357	0	1.68	0.61	2.5	9	2	0	3	3	0	2	1	0	2	6	2	2	2	1	819.7	0	0	150	43	1	8.44	36.88	480.3
1358	1	1.79	1.12	3.148	10	1	0	1	0	0	0	0	1	5	0	2	1	1	1	199.4	0	0	160	64	1	23.91	14.88	477.4
1359	0	1.92	1.23	10.272	14	0	0	0	0	0	0	0	0	2	6	2	2	2	1	148	0	0	115	45	1	34.9	4.62	280.3
1360	0	1.1	0.99	2.4	11	1	0	0	0	0	0	0	0	4	6	2	1	1	1	473.2	0	0	130	51	1	15.73	22.07	517.8
1361	0	2.39	1.79	4.05	10	0	0	0	0	0	0	0	0	2	6	2	1	1	1	628.9	0	0	138	60	1	5.85	9.07	383.9
1362	0	2.79	0.52	3.307	16	10	62.5	3	0	0	0	0	0	1	6	5	2	2	1	143	0	0	110	41	1	38.72	6.41	379.4
1363	0	1.03	1.1	1	10	8	80	0	0	0	0	0	0	3	6	2	2	3	1	294.8	0	0	120	43	1	23.47	10.41	528.3
1364	0	2.87	0.51	0	17	0	0	0	0	0	0	0	0	2	0	2	2	2	1	218.9	0	0	100	19	1	26.58	10.6	142
1365	0	3.23	1.15	1.376	11	6	54.5	1	0	0	0	0	0	3	3	5	2	2	1	255.8	0	0	140	39	1	34.48	21.76	591.3
1366	0	0.81	0.44	0.476	15	7	46.7	2	0	0	0	0	0	3	3	5	2	3	1	292.2	0	0	130	39	1	19.51	13.11	253.6
1367	1	2.15	0.59	5.856	28	0	0	0	0	0	0	0	0	3	0	2	1	1	1	253.6	0	0	130	23	1	31.38	15.44	491.7
1368	0	0.81	0.7	0	17	2	11.8	0	0	0	0	0	0	2	3	2	2	2	1	142.5	0	0	120	46	1	33.79	5.97	173.7
1369	0	0.93	0.74	8.908	13	3	20	0	2	2	0	0	0	6	6	5	2	2	1	154.3	0	0	140	26	1	62.7	6.67	386
1372	0	1.44	0.66	0.666	32	0	0	0	0	0	0	0	0	2	0	2	1	1	1	170.5	0	0	130	25	1	55.58	13.01	470.5
1374	0	1.27	1.45	0	19	5	0	3	11	1	10	0	0	2	6	5	2	2	1	242	0	0	144	23	1	35.68	10.95	396.7
1377	1	2.75	0.69	0	15	2	13	3	2	0	2	0	3	6	0	5	2	2	1	169.4	1	0	125	56	1	28.06	8.78	462.9
1378	0	0.49	0.34	0	36	9	0	0	0	0	0	0	0	5	6	5	2	2	1	158.4	0	0	135	35	1	54.63	13.65	512.7
1379	0	1.09	0.31	0	14	0	0	0	0	0	0	0	0	6	6	5	1	1	1	190.1	0	0	140	25	1	31.94	13.3	591.6
1380	0	1.46	0.77	0	26	8	0	0	0	0	0	0	0	3	0	2	2	2	1	236.2	0	0	140	58	1	25.62	18.55	273.5
1381	0	2.11	0.47	0	14	0	0	3	0	0	0	0	3	3	0	5	2	2	1	134.7	0	0	160	30	1	76.34	8.18	396
1382	0	0.7	1.01	0	8	0	0	0	0	0	0	0	0	2	0	2	1	0	0	355.9	0	0	110	16	1	28.07	22.93	611.4
1383	0	0.91	0.79	3.125	4	3	0	1	1	1	0	0	0	0	3	5	2	2	1	490.3	0	0	150	57	1	12.08	31.6	550.4
1384	0	2.23	1.41	1.5	11	1	0	1	0	0	0	0	0	2	0	2	2	1	1	145.3	0	0	120	49	1	61.63	8.53	642.9
1386	0	2.79	0.76	0.5	8	1	0	0	0	0	0	0	0	2	0	1	1	0	1	218.8	0	0	120	26	1	23.42	14.2	349.8
1387	0	3.32	0.21	1	13	2	0	4	2	0	2	0	0	3	3	5	1	2	1	668.3	0	0	120	50	1	8.03	17.66	587.7
1388	0	1.06	1.07	3.5	23	1	0	0	0	0	0	0	0	2	0	2	1	1	1	256.6	0	0	135	36	1	31.91	12.88	502
1390	1	4.49	1.5	0.6	30	9	0	0	1	0	1	0	0	3	0	2	2	2	1	180.3	0	0	130	41	1	31.57	10.14	354.1
1391	0	0.58	0.69	0.5	6	1	0	1	0	0	0	0	0	2	3	5	2	2	1	198.1	0	0	170	24	1	69.14	7.56	384
1392	0	4.81	0.83	1.427	8	4	0	1	1	1	0	0	1	2	6	5	2	2	1	196.9	0	0	135	65	1	29.52	10.21	498.4
1393	1	3.92	0.81	3.5	11	2	0	0	1	0	1	0	0	3	3	5	2	2	1	136.1	0	0	182	69	1	40.09	7.41	406.2
1394	1	1.85	1.1	0.525	16	8	0	4	0	0	0	0	0	3	0	5	2	2	1	134.1	0	0	120	28	1	52.91	6.83	459.3
